# Supplementary material for: Positional transcriptomics shed light on site-specific pathologies of the aorta
Source: Research Square preprint supplement (doi:10.21203/rs.3.rs-951818/v1), 2021-10-28
Supplement: Supplementary file 1 [file 181481f85a73d0af1e632079.xlsx]

## Sheet: Final List
Supplementary Excel File 3: vSMC Subcluster Gene Signature
Subcluster gene signature as determined by seurat analysis. Output (as gene list) were then filtered for stringency using padj ≤ 0.05
gene	p_val	avg_logFC	pct.1	pct.2	padj	cluster
Tpm2	3.10419e-289	0.198532	1	1	5.87934e-285	0
Rps29	8.58427e-250	0.198952	1	0.997	1.62586e-245	0
Rps21	7.56678e-220	0.219286	0.992	0.979	1.43315e-215	0
mt-Co3	1.73226e-219	0.129959	0.938	0.96	3.28091e-215	0
Dstn	1.58045e-201	0.145775	1	1	2.99338e-197	0
Myl6	8.47653e-200	0.109152	1	1	1.60545e-195	0
mt-Atp6	6.2269e-191	0.112208	0.91	0.953	1.17938e-186	0
Rpl37	3.28898e-179	0.155066	0.998	0.998	6.22932e-175	0
Sh3bgr	3.30571e-170	0.267842	0.916	0.861	6.26102e-166	0
Cox8a	1.04903e-165	0.186489	0.972	0.968	1.98686e-161	0
Myh11	2.70007e-165	0.184311	0.998	0.983	5.11393e-161	0
Rpl37a	1.21284e-162	0.14066	1	0.997	2.29711e-158	0
mt-Nd1	5.12392e-157	0.123141	0.919	0.948	9.7047e-153	0
Rpl38	2.86526e-153	0.187708	0.975	0.962	5.42679e-149	0
Ptgis	9.92917e-147	0.168277	0.998	0.993	1.88058e-142	0
Rpl41	1.43809e-140	0.118498	1	0.999	2.72374e-136	0
Slc22a1	7.26898e-140	0.617067	0.394	0.165	1.37675e-135	0
Hoxa7	1.513e-132	0.360296	0.193	0.031	2.86562e-128	0
Ramp1	1.22987e-125	0.168841	0.977	0.963	2.32937e-121	0
Flna	4.23695e-118	0.146118	0.999	0.988	8.02479e-114	0
Rpl39	3.83013e-115	0.157001	0.989	0.98	7.25427e-111	0
Fth1	1.88337e-110	0.126938	1	1	3.5671e-106	0
Bcam	2.00737e-108	0.195048	0.946	0.907	3.80197e-104	0
Cox4i1	3.57503e-106	0.106955	0.998	0.996	6.7711e-102	0
Atp5e	1.73052e-105	0.158989	0.951	0.937	3.2776e-101	0
Rps15	2.11988e-103	0.106024	1	0.999	4.01506e-99	0
Pbxip1	4.71128e-103	0.1722	0.962	0.94	8.92316e-99	0
Rpl36	2.39954e-95	0.126596	0.995	0.991	4.54472e-91	0
Ndufa13	1.22351e-94	0.151227	0.942	0.923	2.31733e-90	0
Rps27	2.38368e-90	0.119698	1	0.994	4.51469e-86	0
Cox7c	9.87046e-90	0.142002	0.964	0.952	1.86947e-85	0
Cox6c	4.83929e-89	0.118712	0.985	0.978	9.16562e-85	0
Pdlim1	8.42216e-87	0.23136	0.784	0.734	1.59516e-82	0
Tpm1	8.64098e-86	0.123655	1	0.995	1.6366e-81	0
Higd1a	5.75017e-85	0.254281	0.775	0.676	1.08908e-80	0
Rpl35	1.00336e-84	0.139313	0.966	0.951	1.90037e-80	0
Atp5k	1.04416e-84	0.255792	0.724	0.643	1.97764e-80	0
Aplp2	5.1847e-82	0.199882	0.835	0.789	9.81983e-78	0
Ppp1r14a	1.25672e-79	0.156469	0.976	0.944	2.38023e-75	0
Cnn1	2.43006e-79	0.107279	1	0.997	4.60253e-75	0
Rplp2	2.49725e-79	0.101	1	0.998	4.7298e-75	0
Itga8	8.11516e-77	0.147014	0.912	0.911	1.53701e-72	0
Atp5b	1.48107e-71	0.127334	0.944	0.936	2.80515e-67	0
Cald1	2.8536e-68	0.133791	0.993	0.993	5.40472e-64	0
Uqcrh	1.10927e-66	0.11942	0.953	0.942	2.10096e-62	0
Ndufa4	1.18014e-66	0.120622	0.925	0.927	2.23519e-62	0
Rps12	1.50856e-63	0.10487	0.993	0.988	2.85722e-59	0
Pdlim7	2.02383e-60	0.172033	0.783	0.759	3.83314e-56	0
Tcap	4.62864e-57	0.254356	0.729	0.597	8.76664e-53	0
Rpl30	3.07698e-56	0.10522	0.994	0.984	5.82781e-52	0
Rpl36a	3.69638e-56	0.105452	0.987	0.98	7.00095e-52	0
Cox7a2	6.32186e-56	0.110689	0.901	0.912	1.19736e-51	0
Ogn	1.20297e-53	0.238619	0.711	0.636	2.27842e-49	0
Pdlim3	1.6619e-53	0.16149	0.836	0.803	3.14765e-49	0
Ppp1r12a	8.11252e-53	0.170058	0.779	0.761	1.53651e-48	0
Ndufa2	3.41726e-52	0.101408	0.874	0.9	6.47229e-48	0
D8Ertd738e	8.2484e-52	0.128691	0.828	0.82	1.56225e-47	0
Smtn	2.72741e-51	0.120754	0.841	0.86	5.16572e-47	0
Uqcr11	4.67119e-51	0.124196	0.827	0.837	8.84724e-47	0
Uqcr10	4.59161e-50	0.12996	0.786	0.8	8.6965e-46	0
Ndufa6	1.54373e-47	0.139702	0.851	0.814	2.92382e-43	0
Oxct1	1.98126e-46	0.142171	0.795	0.784	3.75251e-42	0
Tceal6	4.36184e-45	0.256825	0.204	0.094	8.26133e-41	0
Susd5	4.77391e-45	0.226194	0.611	0.547	9.04179e-41	0
Wfdc1	6.43584e-43	0.135912	0.808	0.795	1.21895e-38	0
Josd2	6.11862e-40	0.278398	0.435	0.33	1.15887e-35	0
Anapc7	7.19541e-39	0.271896	0.442	0.335	1.36281e-34	0
Hoxa5	6.62387e-38	0.150716	0.106	0.034	1.25456e-33	0
Atp5a1	7.0964e-33	0.116055	0.735	0.745	1.34406e-28	0
Efhd1	3.3732e-32	0.197211	0.553	0.522	6.38884e-28	0
Uqcrq	4.09392e-32	0.115343	0.746	0.745	7.75389e-28	0
Wisp2	7.62368e-32	0.266063	0.35	0.243	1.44393e-27	0
Ndufb7	6.78706e-31	0.127893	0.753	0.717	1.28547e-26	0
Bnip2	1.9581e-30	0.14772	0.683	0.676	3.70864e-26	0
Rgs7bp	1.24606e-28	0.150859	0.179	0.095	2.36004e-24	0
Dapk2	2.8543e-28	0.155436	0.158	0.08	5.40604e-24	0
Tomm7	4.00005e-27	0.111266	0.745	0.737	7.5761e-23	0
Synpo2	1.03077e-26	0.20599	0.523	0.499	1.95228e-22	0
Atp5c1	1.33711e-26	0.105704	0.749	0.749	2.53249e-22	0
Ndufv3	3.90465e-26	0.102631	0.725	0.747	7.39541e-22	0
Gstp1	5.51991e-25	0.202869	0.398	0.306	1.04547e-20	0
Casq1	9.03076e-25	0.279934	0.229	0.148	1.71043e-20	0
Hspb2	1.46936e-21	0.140251	0.597	0.592	2.78298e-17	0
Ndufs6	5.00689e-21	0.105624	0.629	0.644	9.48305e-17	0
Mgat4a	5.7417e-21	0.118658	0.148	0.081	1.08748e-16	0
Myeov2	6.60703e-21	0.100574	0.621	0.648	1.25137e-16	0
Gpsm2	7.97946e-21	0.196065	0.203	0.134	1.51131e-16	0
Anapc11	1.09897e-20	0.110533	0.653	0.647	2.08145e-16	0
Tbx18	8.66259e-20	0.130219	0.145	0.082	1.64069e-15	0
Ndufa3	1.21578e-19	0.150356	0.515	0.501	2.30269e-15	0
Rock1	2.11446e-19	0.114606	0.717	0.703	4.00478e-15	0
Unc119	1.08535e-18	0.155667	0.152	0.09	2.05564e-14	0
Ndrg1	1.09364e-18	0.128374	0.151	0.087	2.07135e-14	0
Nop10	4.45773e-18	0.109708	0.606	0.613	8.44294e-14	0
Fra10ac1	1.50571e-17	0.1381	0.172	0.109	2.85182e-13	0
Npr1	7.63817e-17	0.179567	0.333	0.266	1.44667e-12	0
Mcam	7.90259e-17	0.196714	0.417	0.389	1.49675e-12	0
P2rx1	1.20253e-16	0.143776	0.106	0.056	2.2776e-12	0
P3h2	1.31573e-16	0.12964	0.133	0.078	2.492e-12	0
Art3	4.78376e-16	0.214137	0.208	0.146	9.06045e-12	0
Dmpk	5.46636e-16	0.107674	0.6	0.615	1.03533e-11	0
Ptp4a3	9.43084e-16	0.167559	0.362	0.306	1.7862e-11	0
Atp2a2	1.09025e-15	0.130795	0.544	0.541	2.06492e-11	0
Mef2c	1.43092e-15	0.15497	0.472	0.433	2.71016e-11	0
Anxa11	2.27561e-15	0.132757	0.531	0.545	4.31001e-11	0
Atp1a2	2.49342e-15	0.16857	0.414	0.364	4.72253e-11	0
Gm10076	5.49297e-15	0.212019	0.329	0.295	1.04037e-10	0
Gpi1	2.44749e-14	0.100499	0.583	0.593	4.63554e-10	0
2010107E04Rik	1.44485e-13	0.112803	0.521	0.522	2.73655e-09	0
Jph2	7.65609e-13	0.139348	0.461	0.451	1.45006e-08	0
Ndufs7	2.44755e-12	0.102017	0.523	0.529	4.63566e-08	0
Pcbd2	5.26671e-12	0.118789	0.228	0.164	9.97516e-08	0
Foxp2	1.05988e-11	0.108811	0.151	0.101	2.00742e-07	0
Smim5	7.23395e-11	0.175761	0.312	0.276	1.37011e-06	0
Cds2	1.70784e-10	0.111966	0.199	0.148	3.23465e-06	0
Asb2	2.97621e-10	0.137693	0.281	0.233	5.63694e-06	0
Ccdc42	8.33294e-10	0.201447	0.386	0.358	1.57826e-05	0
Itpr1	1.60183e-09	0.124335	0.215	0.171	3.03386e-05	0
Fam71a	1.97512e-09	0.134156	0.205	0.16	3.74088e-05	0
Syngr2	1.31883e-08	0.120185	0.343	0.302	0.000249787	0
Ppp1r12b	4.02628e-08	0.138385	0.365	0.36	0.000762577	0
Uba2	1.1947e-07	0.152601	0.301	0.281	0.00226276	0
Marveld1	1.2453e-07	0.131548	0.365	0.357	0.00235859	0
Pkd1	7.56956e-07	0.116823	0.237	0.201	0.0143367	0
Itga9	7.5754e-07	0.116457	0.393	0.401	0.0143478	0
Naa38	1.54586e-06	0.101466	0.333	0.294	0.0292786	0
Filip1	1.77064e-06	0.102187	0.186	0.152	0.033536	0
Pkp4	2.60825e-06	0.112656	0.401	0.415	0.0494002	0
Cbr2	1.15764e-25	0.111207	0.802	0.787	2.19257e-21	0
Clu	3.07705e-34	0.104029	0.952	0.939	5.82794e-30	0
Csrp1	2.1964e-60	0.133392	0.997	0.985	4.15999e-56	0
Fibin	1.55021e-117	0.562276	0.451	0.241	2.9361e-113	0
Gadd45g	3.63097e-24	0.243101	0.568	0.532	6.87705e-20	0
Map1b	5.20957e-35	0.112623	0.846	0.856	9.86692e-31	0
Myl9	5.3395e-307	0.206576	1	1	1.0113e-302	0
Rcan2	2.20416e-199	0.184857	0.999	0.997	4.17468e-195	0
Rgs5	2.12365e-155	0.660653	0.539	0.254	4.02219e-151	0
Tagln	2.83255e-103	0.1257	1	0.999	5.36485e-99	0
Tgm2	5.76416e-22	0.146229	0.601	0.561	1.09173e-17	0
Uba52	1.63544e-30	0.245778	0.387	0.301	3.09753e-26	0
Csrp2	2.05405e-163	0.189806	1	0.999	3.89038e-159	1
Pls3	7.36205e-52	0.160929	0.941	0.883	1.39437e-47	1
Rbp1	1.97395e-48	0.14161	0.965	0.924	3.73866e-44	1
Fbxl22	1.4859e-46	0.209183	0.884	0.809	2.81429e-42	1
Pkm	1.83909e-41	0.140216	0.944	0.884	3.48324e-37	1
Prdx4	2.08002e-35	0.211354	0.711	0.599	3.93955e-31	1
Crip2	4.18044e-35	0.139709	0.886	0.845	7.91775e-31	1
Hspb1	8.74856e-34	0.125852	0.98	0.964	1.65698e-29	1
Rcn3	2.6545e-33	0.112791	0.953	0.921	5.02762e-29	1
Aldh2	1.58964e-32	0.146195	0.886	0.804	3.01077e-28	1
Capns1	2.92845e-29	0.102292	0.958	0.931	5.54648e-25	1
Lims2	3.06708e-29	0.187948	0.796	0.675	5.80905e-25	1
Msrb1	4.51998e-28	0.123034	0.934	0.893	8.56085e-24	1
Krt18	1.36395e-27	0.158431	0.185	0.09	2.58333e-23	1
Sh3bgrl	1.62197e-26	0.15378	0.835	0.753	3.07201e-22	1
St5	2.61813e-26	0.200954	0.666	0.557	4.95874e-22	1
Kcnj15	3.55245e-26	0.124352	0.149	0.067	6.72833e-22	1
Rbp4	1.01496e-22	0.233249	0.631	0.489	1.92234e-18	1
Park7	1.42409e-22	0.115569	0.885	0.822	2.69724e-18	1
Tpd52l1	2.09491e-19	0.102418	0.109	0.048	3.96775e-15	1
Rsu1	5.87074e-17	0.149891	0.657	0.568	1.11192e-12	1
Lrrfip1	7.50832e-17	0.121532	0.813	0.738	1.42207e-12	1
Plat	1.50479e-16	0.121654	0.204	0.123	2.85007e-12	1
Mrps6	1.53043e-16	0.17717	0.243	0.162	2.89863e-12	1
Suclg1	5.84459e-16	0.156692	0.35	0.24	1.10696e-11	1
Mmp23	3.49847e-15	0.162153	0.542	0.445	6.62611e-11	1
Fas	9.87781e-14	0.163023	0.344	0.254	1.87086e-09	1
Pamr1	1.89316e-13	0.135841	0.2	0.13	3.58564e-09	1
Ecm2	9.39265e-13	0.150801	0.403	0.31	1.77897e-08	1
Ehd4	1.16907e-12	0.148517	0.314	0.226	2.21422e-08	1
Emilin1	2.03568e-12	0.141671	0.285	0.206	3.85559e-08	1
Wnt16	2.27725e-12	0.122173	0.16	0.1	4.31311e-08	1
1190005I06Rik	3.27846e-12	0.12868	0.661	0.558	6.2094e-08	1
Napa	3.42857e-12	0.140146	0.327	0.238	6.49372e-08	1
Sept7	7.27343e-12	0.138286	0.524	0.466	1.37759e-07	1
Psma2	2.77824e-11	0.128626	0.643	0.548	5.26199e-07	1
E030013I19Rik	4.42534e-11	0.154347	0.513	0.419	8.38158e-07	1
Glrx2	9.70247e-11	0.125256	0.318	0.237	1.83765e-06	1
Pgam1	5.62733e-10	0.1089	0.582	0.517	1.06582e-05	1
Psmc5	7.87783e-10	0.12038	0.449	0.344	1.49206e-05	1
Pdcl3	9.33326e-10	0.123971	0.532	0.445	1.76772e-05	1
Ptprz1	9.56007e-10	0.108668	0.23	0.163	1.81068e-05	1
Psmb4	1.98357e-09	0.106999	0.636	0.554	3.75688e-05	1
Ergic3	2.29617e-09	0.118504	0.511	0.429	4.34894e-05	1
Cct7	2.40322e-09	0.115273	0.507	0.453	4.55171e-05	1
Srp14	3.55586e-09	0.106213	0.718	0.623	6.7348e-05	1
Spint2	3.8463e-09	0.110516	0.563	0.518	7.28489e-05	1
Prkar1a	5.3213e-09	0.122903	0.465	0.383	0.000100785	1
Pkig	7.47723e-09	0.122815	0.517	0.461	0.000141619	1
Pin1	8.14833e-09	0.116487	0.411	0.324	0.000154329	1
Rap1a	9.72194e-09	0.103535	0.373	0.282	0.000184133	1
Serping1	1.44719e-08	0.126088	0.356	0.28	0.000274098	1
Dhrs3	1.67805e-08	0.119003	0.39	0.308	0.000317823	1
Lbh	1.81792e-08	0.114704	0.332	0.26	0.000344314	1
Capza2	1.95859e-08	0.112141	0.363	0.29	0.000370957	1
Sgcg	2.29678e-08	0.10699	0.617	0.557	0.000435011	1
Atraid	3.9744e-08	0.108949	0.537	0.463	0.000752752	1
Glo1	4.8424e-08	0.108946	0.385	0.313	0.00091715	1
Mob2	6.99377e-08	0.124502	0.362	0.29	0.00132462	1
Ppp2r1a	7.35036e-08	0.10535	0.438	0.352	0.00139216	1
Oaz2	1.04716e-07	0.115106	0.474	0.429	0.00198331	1
2010111I01Rik	1.08765e-07	0.117237	0.336	0.262	0.00206001	1
Srrm2	1.1761e-07	0.115175	0.419	0.334	0.00222753	1
Cdc37	1.21651e-07	0.100356	0.592	0.534	0.00230406	1
Psme1	1.25472e-07	0.10202	0.276	0.21	0.00237644	1
Ndufa8	1.25532e-07	0.105547	0.471	0.39	0.00237757	1
Uqcrc2	1.59215e-07	0.102672	0.334	0.261	0.00301553	1
Vdac1	2.69489e-07	0.109712	0.341	0.273	0.00510411	1
Sdhc	4.39175e-07	0.107492	0.417	0.353	0.00831797	1
Tmem50a	9.72945e-07	0.100972	0.502	0.445	0.0184276	1
Gucy1b3	1.29692e-06	0.107979	0.318	0.267	0.0245638	1
Wbp5	1.3347e-06	0.100972	0.66	0.583	0.0252793	1
Acta2	3.70777e-105	0.127896	1	1	7.02251e-101	1
Aspn	4.75533e-24	0.221595	0.161	0.081	9.00659e-20	1
Atp6ap1	3.13451e-15	0.155029	0.55	0.46	5.93676e-11	1
Bsg	9.59253e-25	0.121598	0.923	0.852	1.81683e-20	1
Cav2	6.77016e-09	0.121027	0.259	0.196	0.000128227	1
Ccdc107	6.09782e-18	0.144102	0.728	0.635	1.15493e-13	1
Cnn3	2.29083e-15	0.132561	0.765	0.666	4.33882e-11	1
Cpe	7.83785e-67	0.10165	1	0.999	1.48449e-62	1
Cpq	1.72493e-34	0.210895	0.672	0.575	3.26702e-30	1
Ctsa	5.99341e-13	0.147856	0.473	0.382	1.13515e-08	1
Ctsb	1.34621e-36	0.112306	0.973	0.948	2.54972e-32	1
Ctsd	7.6198e-46	0.148279	0.939	0.874	1.44319e-41	1
Dkk3	1.22979e-22	0.204929	0.491	0.369	2.32921e-18	1
Ecm1	1.08101e-50	0.181788	0.902	0.845	2.04743e-46	1
Emc10	5.28e-12	0.101124	0.758	0.699	1.00003e-07	1
Gpx1	1.30329e-39	0.119712	0.979	0.952	2.46842e-35	1
Gstm1	1.64761e-88	0.210404	0.987	0.93	3.12057e-84	1
Hexb	2.78467e-16	0.150258	0.287	0.189	5.27416e-12	1
Il11ra1	2.79708e-17	0.131075	0.781	0.698	5.29766e-13	1
Lamp1	7.74403e-30	0.11568	0.951	0.903	1.46672e-25	1
Mfap4	6.65191e-99	0.334252	0.919	0.813	1.25987e-94	1
mt-Cytb	3.46821e-21	0.205609	0.851	0.69	6.56878e-17	1
Nov	1.05993e-103	0.434491	0.75	0.509	2.0075e-99	1
Optc	1.2726e-13	0.151623	0.584	0.51	2.41031e-09	1
Pfkp	1.1546e-09	0.12874	0.314	0.241	2.18682e-05	1
Prdx1	2.49127e-37	0.128123	0.925	0.882	4.71846e-33	1
Rarres2	1.78217e-62	0.156341	0.962	0.936	3.37542e-58	1
Rpn2	2.51345e-10	0.123303	0.663	0.573	4.76048e-06	1
Rsrp1	2.96785e-08	0.120048	0.482	0.423	0.000562111	1
Slc48a1	1.26674e-12	0.135785	0.59	0.521	2.3992e-08	1
Sparcl1	1.02015e-71	0.449339	0.666	0.488	1.93217e-67	1
Tnnt2	1.18603e-22	0.304008	0.13	0.06	2.24634e-18	1
Wif1	9.44531e-58	0.420525	0.421	0.241	1.78894e-53	1
Pde1c	4.60568e-121	0.102412	0.14	0.012	8.72316e-117	2
Ube2q2	1.86584e-98	0.100111	0.166	0.026	3.5339e-94	2
Rasd1	7.50242e-69	0.490591	0.207	0.065	1.42096e-64	2
Gm9780	2.46622e-66	0.324469	0.256	0.098	4.67103e-62	2
Egr2	6.82187e-63	0.179754	0.11	0.02	1.29206e-58	2
Ewsr1	5.06373e-57	0.219788	0.337	0.14	9.59071e-53	2
Rasl11a	3.20195e-56	0.383199	0.337	0.153	6.06449e-52	2
Lsmem1	1.29369e-51	0.352612	0.241	0.104	2.45024e-47	2
Gnai1	6.86806e-51	0.226468	0.356	0.163	1.30081e-46	2
Lims1	2.45124e-49	0.214161	0.249	0.101	4.64264e-45	2
Adarb1	1.941e-44	0.169361	0.231	0.092	3.67626e-40	2
Clk1	1.35033e-41	0.243726	0.199	0.081	2.55752e-37	2
Rora	1.82917e-40	0.181837	0.267	0.119	3.46444e-36	2
Otud1	4.12505e-40	0.269022	0.239	0.109	7.81284e-36	2
Pvr	2.20656e-39	0.123681	0.109	0.03	4.17922e-35	2
Siah2	3.43212e-39	0.122841	0.104	0.028	6.50044e-35	2
Rps27rt	1.07819e-38	0.25478	0.491	0.29	2.04208e-34	2
Set	2.5093e-38	0.259221	0.393	0.224	4.75261e-34	2
Sub1	2.87747e-38	0.269423	0.6	0.419	5.44993e-34	2
Acin1	1.15337e-35	0.142611	0.227	0.098	2.18449e-31	2
Rrad	3.21311e-35	0.437074	0.756	0.63	6.08563e-31	2
Plekhg3	3.80178e-35	0.139316	0.186	0.074	7.20057e-31	2
Gm2000	1.07556e-34	0.237651	0.389	0.224	2.03711e-30	2
Vldlr	3.17416e-34	0.186523	0.296	0.157	6.01186e-30	2
Hspa1a	4.02532e-34	0.338176	0.308	0.162	7.62395e-30	2
Gm16286	9.15137e-33	0.160042	0.315	0.157	1.73327e-28	2
Tm2d1	1.40394e-32	0.153289	0.301	0.148	2.65906e-28	2
Cyr61	1.62304e-32	0.314929	0.803	0.647	3.07403e-28	2
Zfand3	3.01088e-32	0.137468	0.264	0.124	5.7026e-28	2
Rpl13-ps3	3.34823e-32	0.229993	0.324	0.183	6.34155e-28	2
BC005537	5.2126e-32	0.162039	0.246	0.121	9.87266e-28	2
Pdlim2	9.55136e-32	0.229737	0.422	0.255	1.80903e-27	2
Pafah1b1	1.9494e-31	0.22465	0.307	0.172	3.69217e-27	2
Gm15417	2.2464e-31	0.123349	0.212	0.093	4.25467e-27	2
Tmem165	3.38452e-31	0.149654	0.306	0.153	6.41029e-27	2
Fbl	7.84005e-31	0.152719	0.271	0.133	1.48491e-26	2
Nav2	2.40979e-30	0.148527	0.262	0.128	4.56414e-26	2
Skil	2.89654e-30	0.227171	0.164	0.074	5.48605e-26	2
Stx5a	3.85047e-30	0.133246	0.209	0.093	7.2928e-26	2
Spsb1	4.27831e-30	0.126045	0.15	0.06	8.10313e-26	2
Cdc42se1	4.9343e-29	0.141009	0.249	0.12	9.34556e-25	2
Eif5	7.23287e-29	0.248155	0.48	0.316	1.3699e-24	2
Chic2	1.10784e-28	0.128141	0.202	0.093	2.09826e-24	2
Srpr	2.4708e-28	0.153174	0.344	0.186	4.6797e-24	2
Nfib	2.57062e-28	0.234388	0.455	0.293	4.86875e-24	2
Plvap	3.10987e-28	0.142004	0.183	0.084	5.8901e-24	2
Tcf4	1.16232e-27	0.13845	0.185	0.088	2.20144e-23	2
Reep3	2.22066e-27	0.151098	0.244	0.125	4.20593e-23	2
Ttc21a	7.03347e-27	0.122498	0.125	0.05	1.33214e-22	2
Spty2d1	1.12752e-26	0.123893	0.116	0.044	2.13553e-22	2
Tnrc6a	2.13165e-26	0.139107	0.253	0.129	4.03735e-22	2
Abhd17a	6.82128e-26	0.129121	0.305	0.162	1.29195e-21	2
Rnf167	7.08183e-26	0.128172	0.254	0.129	1.3413e-21	2
Mylk	9.57143e-26	0.126513	0.966	0.907	1.81283e-21	2
Cisd2	1.59567e-25	0.145775	0.258	0.138	3.02221e-21	2
Cyth2	2.52583e-25	0.146963	0.281	0.15	4.78392e-21	2
Sec31a	2.83436e-25	0.149443	0.328	0.183	5.36828e-21	2
Ywhaz	2.84974e-25	0.205007	0.373	0.221	5.39741e-21	2
Fam46a	2.97824e-25	0.178493	0.296	0.168	5.64078e-21	2
Crybb3	1.11351e-24	0.102808	0.101	0.037	2.10899e-20	2
Xirp1	2.00228e-24	0.13281	0.139	0.061	3.79231e-20	2
Zfp36l2	2.00383e-24	0.133768	0.17	0.079	3.79525e-20	2
Tex261	2.07534e-24	0.130153	0.209	0.104	3.93069e-20	2
Sf3b1	2.33502e-24	0.209717	0.432	0.27	4.42253e-20	2
Ube2a	2.97177e-24	0.138821	0.261	0.138	5.62853e-20	2
Foxn3	3.4792e-24	0.136624	0.209	0.11	6.58961e-20	2
Arrdc3	3.64668e-24	0.135723	0.153	0.071	6.90681e-20	2
Ctdsp1	3.88719e-24	0.150836	0.379	0.219	7.36233e-20	2
Dnaja1	5.34427e-24	0.234219	0.508	0.339	1.0122e-19	2
Tmem65	3.02638e-23	0.140505	0.259	0.144	5.73197e-19	2
Atxn7l3b	5.9644e-23	0.14558	0.383	0.226	1.12966e-18	2
Chd4	6.84821e-23	0.143146	0.277	0.154	1.29705e-18	2
Lpp	7.69447e-23	0.194395	0.845	0.686	1.45733e-18	2
Ptpn11	9.06464e-23	0.121365	0.193	0.096	1.71684e-18	2
Hipk3	9.38696e-23	0.114257	0.174	0.083	1.77789e-18	2
Zfr	1.01065e-22	0.101984	0.211	0.105	1.91416e-18	2
Gpr108	1.08779e-22	0.107245	0.22	0.11	2.06027e-18	2
Mafk	1.10253e-22	0.165284	0.216	0.118	2.08819e-18	2
G3bp2	1.21668e-22	0.127403	0.274	0.15	2.30438e-18	2
Usp9x	1.39985e-22	0.123115	0.206	0.106	2.65132e-18	2
Ext1	1.61234e-22	0.126716	0.235	0.123	3.05377e-18	2
Osbpl9	1.6538e-22	0.114221	0.251	0.132	3.1323e-18	2
Ankrd12	1.74117e-22	0.15093	0.274	0.154	3.29777e-18	2
Nfic	1.85508e-22	0.144634	0.397	0.241	3.51352e-18	2
Copz1	2.30569e-22	0.11036	0.286	0.153	4.36697e-18	2
Mrpl15	2.98913e-22	0.110683	0.229	0.117	5.66141e-18	2
Smarce1	3.89779e-22	0.104673	0.217	0.11	7.38241e-18	2
Creb5	1.41362e-21	0.168944	0.215	0.118	2.6774e-17	2
Ube2d3	2.27307e-21	0.195543	0.705	0.53	4.3052e-17	2
Igf1r	3.51034e-21	0.141477	0.243	0.14	6.64859e-17	2
Srrm1	3.90145e-21	0.130644	0.328	0.189	7.38935e-17	2
Foxc2	4.01244e-21	0.124077	0.166	0.083	7.59956e-17	2
Plac9b	4.43934e-21	0.113968	0.132	0.061	8.40811e-17	2
Snrpb2	4.49103e-21	0.111984	0.255	0.138	8.506e-17	2
Peli2	5.05962e-21	0.102138	0.185	0.092	9.58293e-17	2
Ano6	6.51702e-21	0.127863	0.29	0.166	1.23432e-16	2
Fam174a	6.84535e-21	0.113632	0.269	0.147	1.29651e-16	2
Plgrkt	7.38618e-21	0.106542	0.234	0.124	1.39894e-16	2
Mafg	8.61439e-21	0.128457	0.185	0.098	1.63156e-16	2
Setd8	8.82434e-21	0.106985	0.184	0.092	1.67133e-16	2
Stk17b	1.47936e-20	0.129614	0.164	0.084	2.8019e-16	2
Kank2	1.59594e-20	0.130512	0.283	0.161	3.02271e-16	2
Zbtb38	1.68107e-20	0.114853	0.251	0.137	3.18395e-16	2
Rraga	1.80914e-20	0.106511	0.292	0.162	3.42651e-16	2
Cr1l	5.42188e-20	0.101921	0.251	0.136	1.0269e-15	2
Emd	2.09832e-19	0.211224	0.396	0.277	3.97421e-15	2
Ankrd11	2.42491e-19	0.126369	0.255	0.149	4.59278e-15	2
Dact3	3.87755e-19	0.120577	0.268	0.155	7.34408e-15	2
Bcar3	8.44319e-19	0.101802	0.207	0.111	1.59914e-14	2
Wac	8.78791e-19	0.106282	0.198	0.105	1.66443e-14	2
Hbb-bs	1.06174e-18	0.762642	0.146	0.072	2.01094e-14	2
Sqstm1	1.06529e-18	0.205335	0.522	0.407	2.01766e-14	2
Nexn	1.26246e-18	0.185712	0.801	0.601	2.39109e-14	2
Syne2	1.57259e-18	0.116169	0.157	0.083	2.97849e-14	2
Coro1b	1.69829e-18	0.102584	0.234	0.13	3.21655e-14	2
Copg1	1.82229e-18	0.103584	0.238	0.132	3.45143e-14	2
Socs2	1.97293e-18	0.197912	0.231	0.148	3.73673e-14	2
Fam114a1	2.08021e-18	0.1102	0.238	0.134	3.93991e-14	2
Lrp10	2.40853e-18	0.102876	0.279	0.16	4.56176e-14	2
Ssr3	2.44442e-18	0.124116	0.281	0.165	4.62974e-14	2
Pde4a	3.29336e-18	0.105596	0.159	0.084	6.23763e-14	2
Eprs	3.80731e-18	0.225702	0.279	0.186	7.21104e-14	2
Plin4	4.5348e-18	0.120333	0.242	0.138	8.58892e-14	2
Tpr	4.6474e-18	0.108649	0.293	0.171	8.80218e-14	2
Jmjd1c	6.26292e-18	0.110403	0.131	0.065	1.1862e-13	2
Adm	6.44571e-18	0.142151	0.201	0.114	1.22082e-13	2
Kif5b	7.37089e-18	0.181128	0.669	0.464	1.39605e-13	2
Fam132a	8.38573e-18	0.103196	0.252	0.143	1.58826e-13	2
Eif3j1	9.17584e-18	0.101372	0.222	0.122	1.7379e-13	2
Fus	1.16268e-17	0.187935	0.449	0.313	2.20212e-13	2
Cops4	1.26752e-17	0.102357	0.281	0.161	2.40068e-13	2
Abhd16a	1.74914e-17	0.109659	0.265	0.155	3.31287e-13	2
Ssbp2	6.86429e-17	0.106001	0.253	0.147	1.3001e-12	2
Ddr2	8.83317e-17	0.103052	0.27	0.159	1.673e-12	2
Rabggtb	1.5865e-16	0.10738	0.201	0.113	3.00484e-12	2
Cops8	1.79804e-16	0.103667	0.3	0.178	3.40549e-12	2
Psmg4	1.88541e-16	0.106	0.229	0.133	3.57096e-12	2
Dusp8	2.02973e-16	0.101427	0.172	0.095	3.8443e-12	2
Pja2	2.2709e-16	0.101304	0.238	0.138	4.30109e-12	2
Rp9	2.63283e-16	0.102816	0.324	0.195	4.98659e-12	2
Hnrnpf	2.88456e-16	0.154581	0.419	0.28	5.46336e-12	2
Clip1	5.16538e-16	0.105923	0.217	0.125	9.78323e-12	2
Tnfsf12	5.61852e-16	0.116677	0.276	0.17	1.06415e-11	2
Ddx3x	7.81373e-16	0.167342	0.344	0.23	1.47992e-11	2
Ddx1	1.60438e-15	0.102741	0.268	0.162	3.0387e-11	2
Rasl11b	1.97948e-15	0.186029	0.465	0.332	3.74913e-11	2
Nfix	3.73101e-15	0.151616	0.39	0.279	7.06654e-11	2
Impdh2	3.79338e-15	0.1675	0.313	0.212	7.18465e-11	2
Kcnq1ot1	4.93156e-15	0.118763	0.146	0.08	9.34037e-11	2
C1qtnf2	5.74724e-15	0.155276	0.429	0.296	1.08853e-10	2
Camta1	6.70307e-15	0.106504	0.285	0.176	1.26956e-10	2
Smarca5	9.41705e-15	0.126116	0.22	0.139	1.78359e-10	2
Zbtb7a	1.14027e-14	0.138228	0.213	0.135	2.15968e-10	2
Pura	1.22176e-14	0.132203	0.334	0.222	2.31402e-10	2
Mat2a	1.69331e-14	0.155443	0.276	0.183	3.20714e-10	2
Cfl1	4.0338e-14	0.113492	0.953	0.852	7.64002e-10	2
Ubap2l	5.19737e-14	0.102284	0.201	0.125	9.84381e-10	2
Ptp4a2	9.64105e-14	0.144296	0.424	0.303	1.82601e-09	2
mt-Nd5	1.21225e-13	0.132681	0.177	0.098	2.296e-09	2
Arf5	2.51793e-13	0.142123	0.343	0.235	4.76895e-09	2
Pfdn2	3.59999e-13	0.135962	0.392	0.27	6.81837e-09	2
Ube2s	3.88304e-13	0.16387	0.568	0.428	7.35448e-09	2
Eif4a2	6.07426e-13	0.153953	0.662	0.501	1.15047e-08	2
Rab6a	6.16816e-13	0.139888	0.292	0.205	1.16825e-08	2
Tcf25	1.37634e-12	0.132197	0.396	0.27	2.60678e-08	2
Nr1d1	1.44673e-12	0.147866	0.227	0.153	2.74011e-08	2
Syne1	1.56189e-12	0.103971	0.299	0.198	2.95822e-08	2
Atf5	2.60038e-12	0.195728	0.376	0.29	4.92513e-08	2
Ubald2	2.85863e-12	0.142559	0.27	0.185	5.41424e-08	2
Nktr	3.6299e-12	0.120938	0.181	0.116	6.87504e-08	2
Rac1	3.89624e-12	0.146567	0.612	0.43	7.37948e-08	2
Hdgf	4.00193e-12	0.145348	0.493	0.369	7.57966e-08	2
Gem	4.5974e-12	0.185721	0.407	0.308	8.70748e-08	2
Ebf1	8.62988e-12	0.133997	0.337	0.241	1.6345e-07	2
Mtch1	9.41174e-12	0.134693	0.505	0.358	1.78258e-07	2
Chka	9.46568e-12	0.149225	0.188	0.124	1.7928e-07	2
Gm6133	1.00796e-11	0.106538	0.223	0.151	1.90907e-07	2
Dlgap4	1.0211e-11	0.133031	0.283	0.2	1.93397e-07	2
Mapre1	1.05357e-11	0.140856	0.461	0.341	1.99545e-07	2
Cox20	1.77401e-11	0.126603	0.338	0.24	3.35998e-07	2
Rgs4	2.59072e-11	0.102329	0.369	0.25	4.90682e-07	2
Gm10073	4.15559e-11	0.124193	0.69	0.589	7.87069e-07	2
Pcbp1	4.81431e-11	0.124881	0.43	0.309	9.11831e-07	2
Rbm8a	1.02113e-10	0.131654	0.51	0.359	1.93402e-06	2
Zfp706	1.43103e-10	0.117456	0.445	0.303	2.71037e-06	2
Fkbp2	2.05249e-10	0.12805	0.526	0.38	3.88741e-06	2
Pcbp2	2.25757e-10	0.136673	0.522	0.393	4.27583e-06	2
Ost4	2.57221e-10	0.131444	0.667	0.549	4.87176e-06	2
Rab14	3.04451e-10	0.122531	0.429	0.314	5.7663e-06	2
Gstt1	3.25522e-10	0.129207	0.274	0.199	6.16538e-06	2
Asap2	4.96457e-10	0.104704	0.276	0.192	9.40289e-06	2
Tuba1b	5.19405e-10	0.142019	0.818	0.652	9.83753e-06	2
Tma7	5.42324e-10	0.138133	0.599	0.474	1.02716e-05	2
Srp9	5.70849e-10	0.123555	0.483	0.365	1.08119e-05	2
Pxdc1	5.81312e-10	0.131494	0.22	0.157	1.10101e-05	2
March2	6.88441e-10	0.122696	0.475	0.348	1.30391e-05	2
Prelp	6.89778e-10	0.134893	0.674	0.537	1.30644e-05	2
Nhp2l1	9.77725e-10	0.127334	0.476	0.346	1.85181e-05	2
Ubxn4	1.52618e-09	0.100856	0.3	0.216	2.89058e-05	2
Cstb	1.66589e-09	0.133374	0.483	0.395	3.1552e-05	2
Perp	1.79127e-09	0.113912	0.448	0.327	3.39267e-05	2
Cdk2ap2	1.79231e-09	0.115783	0.511	0.356	3.39464e-05	2
Csnk1a1	2.91534e-09	0.117691	0.52	0.383	5.52165e-05	2
Rpl27-ps3	3.17669e-09	0.109972	0.318	0.239	6.01665e-05	2
Son	3.38803e-09	0.123269	0.664	0.539	6.41693e-05	2
Rbpms	6.82471e-09	0.139734	0.858	0.695	0.00012926	2
Sepp1	7.42497e-09	0.116935	0.523	0.458	0.000140629	2
Luc7l2	7.73826e-09	0.105368	0.257	0.187	0.000146563	2
Arid5b	8.94613e-09	0.124062	0.543	0.421	0.00016944	2
Hmgn3	1.14785e-08	0.116605	0.427	0.328	0.000217403	2
Ltbp4	1.15744e-08	0.127242	0.606	0.506	0.000219219	2
Tuba1c	1.56399e-08	0.118214	0.258	0.189	0.000296219	2
Rab11b	1.87323e-08	0.109206	0.513	0.375	0.00035479	2
Lsm6	2.16109e-08	0.105914	0.425	0.311	0.00040931	2
Usmg5	2.29367e-08	0.13342	0.63	0.478	0.000434421	2
Ppp2ca	2.62413e-08	0.100373	0.331	0.243	0.000497011	2
Nedd4	3.18697e-08	0.119033	0.573	0.442	0.000603612	2
Lmcd1	3.56639e-08	0.112651	0.935	0.834	0.000675475	2
Thra	4.20699e-08	0.112798	0.639	0.5	0.000796803	2
Tmed2	5.94974e-08	0.112976	0.582	0.478	0.00112688	2
Gm10116	7.77519e-08	0.105786	0.117	0.077	0.00147262	2
Ywhah	8.055e-08	0.112488	0.62	0.461	0.00152562	2
Celf2	8.15588e-08	0.103209	0.341	0.267	0.00154472	2
Gas6	9.12232e-08	0.132813	0.574	0.47	0.00172777	2
Cycs	1.6925e-07	0.109318	0.571	0.43	0.00320559	2
Xbp1	2.22388e-07	0.105209	0.195	0.142	0.00421202	2
Eif3a	3.07336e-07	0.104574	0.286	0.221	0.00582095	2
Snrpg	3.6591e-07	0.100328	0.445	0.336	0.00693034	2
Gm11808	4.00246e-07	0.106419	0.509	0.442	0.00758066	2
Hnrnpa1	6.51895e-07	0.10061	0.381	0.297	0.0123469	2
4930523C07Rik	8.33684e-07	0.105155	0.747	0.68	0.01579	2
Morf4l2	1.98458e-06	0.101028	0.496	0.386	0.0375879	2
1500009L16Rik	2.78796e-23	0.134186	0.221	0.116	5.2804e-19	2
2200002D01Rik	1.77459e-09	0.135684	0.374	0.287	3.36108e-05	2
Adamts1	4.96196e-59	0.36299	0.424	0.217	9.39794e-55	2
Aebp1	3.43725e-23	0.13248	0.97	0.904	6.51015e-19	2
Aff4	4.5135e-39	0.167451	0.208	0.084	8.54856e-35	2
Apoe	2.46496e-260	0.928977	0.68	0.285	4.66863e-256	2
Arc	3.54432e-89	0.404548	0.177	0.037	6.71294e-85	2
Arid5a	1.04334e-07	0.111012	0.129	0.087	0.00197609	2
Arl4a	1.24707e-09	0.139536	0.515	0.424	2.36195e-05	2
Atf3	0	1.4269	0.859	0.346	0	2
Atf4	1.88721e-167	0.599598	0.672	0.358	3.57437e-163	2
Atg101	2.19975e-27	0.136988	0.182	0.081	4.16633e-23	2
Atp1a1	2.77168e-12	0.133553	0.524	0.352	5.24955e-08	2
Bag3	5.94167e-25	0.193479	0.206	0.11	1.12535e-20	2
Bambi	5.19328e-16	0.17915	0.256	0.16	9.83607e-12	2
Bhlhe40	1.24856e-77	0.272364	0.143	0.027	2.36477e-73	2
Blmh	3.45837e-20	0.139163	0.3	0.178	6.55015e-16	2
Brd2	1.66404e-56	0.363658	0.385	0.194	3.1517e-52	2
Btg1	6.7927e-66	0.396446	0.569	0.347	1.28654e-61	2
Btg2	0	1.12046	0.923	0.553	0	2
Bzw1	1.06431e-24	0.134081	0.204	0.101	2.01581e-20	2
Camk2n1	1.64089e-82	0.403782	0.397	0.18	3.10785e-78	2
Cav1	4.77952e-65	0.314067	0.828	0.64	9.0524e-61	2
Ccdc59	4.06638e-52	0.196845	0.297	0.121	7.70172e-48	2
Ccnl1	9.35772e-185	0.622577	0.479	0.151	1.77235e-180	2
Ccnl2	1.47707e-37	0.138696	0.15	0.052	2.79758e-33	2
Cdkn1a	4.44736e-203	0.85697	0.554	0.2	8.4233e-199	2
Cebpb	0	1.23667	0.55	0.125	0	2
Cenpb	1.20707e-19	0.123356	0.335	0.198	2.28618e-15	2
Cfh	6.78911e-155	0.67143	0.463	0.168	1.28586e-150	2
Ckap4	1.95441e-39	0.278926	0.402	0.247	3.70165e-35	2
Ckb	7.36555e-44	0.202313	0.937	0.818	1.39504e-39	2
Cnn2	1.84028e-08	0.12537	0.609	0.488	0.000348548	2
Col14a1	3.01996e-22	0.138407	0.164	0.081	5.7198e-18	2
Col1a2	1.09433e-34	0.188141	0.893	0.797	2.07267e-30	2
Col3a1	1.24595e-51	0.251091	0.828	0.718	2.35984e-47	2
Col4a6	1.256e-23	0.112238	0.202	0.099	2.37887e-19	2
Coq10b	3.40649e-53	0.307789	0.265	0.114	6.45189e-49	2
Cped1	7.82552e-42	0.276858	0.75	0.517	1.48215e-37	2
Crip1	2.04374e-160	0.332153	0.996	0.938	3.87085e-156	2
Crtap	1.21872e-15	0.118405	0.316	0.201	2.30826e-11	2
Csrnp1	1.71213e-262	0.685646	0.415	0.078	3.24277e-258	2
Ctgf	8.92162e-25	0.223979	0.617	0.433	1.68976e-20	2
Cytl1	8.14351e-137	0.708366	0.379	0.128	1.54238e-132	2
Ddit3	1.10568e-73	0.456459	0.293	0.118	2.09416e-69	2
Ddx5	5.74207e-37	0.253588	0.81	0.616	1.08755e-32	2
Dnajb1	1.14382e-46	0.307373	0.24	0.104	2.1664e-42	2
Dnajb4	3.56531e-56	0.346732	0.527	0.305	6.75269e-52	2
Dnajb9	9.7516e-24	0.151437	0.14	0.064	1.84695e-19	2
Dnajc1	1.17152e-26	0.155093	0.323	0.177	2.21886e-22	2
Dram2	1.95906e-86	0.107316	0.188	0.04	3.71047e-82	2
Dusp1	4.2941e-202	0.587313	0.959	0.707	8.13302e-198	2
Egr1	0	1.31095	0.861	0.313	0	2
Eif4a1	1.04095e-27	0.221224	0.752	0.576	1.97156e-23	2
Eif4a3	3.37637e-33	0.152371	0.263	0.122	6.39485e-29	2
Eif4g1	4.34233e-11	0.107336	0.226	0.15	8.22437e-07	2
Errfi1	9.58232e-207	0.817938	0.486	0.151	1.81489e-202	2
Fabp4	1.38168e-82	0.462136	0.542	0.305	2.6169e-78	2
Filip1l	1.86228e-29	0.244923	0.703	0.528	3.52716e-25	2
Fosb	0	1.19992	0.615	0.172	0	2
Fosl2	9.53402e-38	0.263755	0.175	0.074	1.80574e-33	2
Foxs1	2.41145e-35	0.223538	0.196	0.088	4.56728e-31	2
Fryl	3.39064e-26	0.157781	0.254	0.136	6.42188e-22	2
Ftl1	0	0.664432	0.899	0.703	0	2
Fzd1	8.18372e-23	0.140326	0.195	0.103	1.55e-18	2
Gadd45a	2.73648e-20	0.115201	0.104	0.043	5.18289e-16	2
Gadd45b	3.0635e-205	0.928876	0.511	0.162	5.80226e-201	2
Gata6	1.62133e-23	0.187357	0.239	0.133	3.0708e-19	2
Gatad1	4.80421e-28	0.125416	0.177	0.078	9.09918e-24	2
Gm12840	1.65902e-32	0.370568	0.222	0.111	3.14219e-28	2
Gm17056	2.18942e-87	0.345559	0.331	0.119	4.14676e-83	2
Gm8730	1.13041e-57	0.256248	0.822	0.657	2.141e-53	2
Gm9493	1.3664e-45	0.292251	0.536	0.355	2.58796e-41	2
Gm9843	4.86693e-33	0.203692	0.819	0.658	9.21797e-29	2
Golgb1	1.02181e-14	0.11695	0.379	0.246	1.93531e-10	2
Golim4	1.36036e-19	0.119796	0.285	0.162	2.57652e-15	2
Gsn	8.49359e-236	0.448894	0.962	0.832	1.60869e-231	2
Gucy1a3	1.6036e-32	0.240124	0.358	0.213	3.03721e-28	2
H3f3b	6.59088e-283	0.42402	0.984	0.912	1.24831e-278	2
Hand2	1.56168e-147	0.372232	0.344	0.084	2.95782e-143	2
Hbegf	4.88397e-171	0.857414	0.568	0.248	9.25023e-167	2
Hes1	6.54555e-236	1.1294	0.53	0.169	1.23973e-231	2
Hexim1	5.3621e-25	0.11587	0.123	0.049	1.01558e-20	2
Hk2	6.86084e-40	0.266522	0.253	0.121	1.29944e-35	2
Hmgb1	5.35586e-13	0.146821	0.761	0.597	1.0144e-08	2
Hnrnpdl	1.362e-14	0.159435	0.291	0.189	2.57962e-10	2
Hnrnph3	8.76716e-21	0.109766	0.275	0.15	1.6605e-16	2
Hoxb3os	5.77131e-40	0.119158	0.12	0.035	1.09309e-35	2
Hspa2	1.75554e-20	0.165844	0.205	0.113	3.325e-16	2
Hspb6	3.79157e-128	0.408089	0.858	0.651	7.18124e-124	2
Htra3	1.51362e-24	0.203615	0.66	0.508	2.8668e-20	2
Hypk	6.99318e-41	0.178487	0.225	0.093	1.32451e-36	2
Id1	0	1.01073	0.833	0.424	0	2
Id2	1.42013e-43	0.355068	0.683	0.501	2.68972e-39	2
Id3	0	0.73202	0.965	0.733	0	2
Ier2	0	1.30496	0.91	0.374	0	2
Ier3	2.19834e-90	0.617791	0.353	0.138	4.16365e-86	2
Ier5	1.27439e-174	0.745613	0.366	0.089	2.4137e-170	2
Ifitm3	1.19877e-159	0.579336	0.699	0.444	2.27046e-155	2
Ifrd1	1.83634e-211	0.994502	0.528	0.199	3.47804e-207	2
Igfbp4	3.62253e-297	1.06983	0.524	0.125	6.86107e-293	2
Inhba	4.94872e-53	0.255525	0.396	0.194	9.37288e-49	2
Irs2	3.80992e-118	0.469068	0.272	0.072	7.21599e-114	2
Itih4	2.808e-38	0.347485	0.483	0.32	5.31835e-34	2
Jun	4.02259e-194	0.758949	0.845	0.501	7.61879e-190	2
Junb	0	1.30385	0.874	0.367	0	2
Jund	1.71041e-199	0.468019	0.947	0.79	3.23951e-195	2
Kdm6b	1.95583e-28	0.183205	0.102	0.035	3.70433e-24	2
Klf10	7.7683e-44	0.196822	0.118	0.033	1.47132e-39	2
Klf13	2.68323e-94	0.438909	0.464	0.212	5.08204e-90	2
Klf2	0	1.1147	0.898	0.501	0	2
Klf4	0	1.23384	0.674	0.242	0	2
Klf6	2.9051e-118	0.63222	0.631	0.385	5.50226e-114	2
Klf7	1.11885e-11	0.129306	0.218	0.146	2.1191e-07	2
Klf9	2.1788e-50	0.285468	0.741	0.57	4.12664e-46	2
Lipo1	3.64689e-81	0.101583	0.185	0.041	6.90722e-77	2
Lox	1.64966e-17	0.179487	0.27	0.177	3.12445e-13	2
Lrrc58	2.88141e-56	0.325199	0.631	0.433	5.4574e-52	2
Ly6a	3.45352e-55	0.222934	0.106	0.021	6.54096e-51	2
Maff	8.51038e-107	0.473584	0.272	0.079	1.61187e-102	2
Mcl1	1.13252e-89	0.423228	0.336	0.129	2.14499e-85	2
Mgll	3.58347e-44	0.278416	0.5	0.303	6.78709e-40	2
Midn	1.27542e-64	0.196564	0.147	0.035	2.41564e-60	2
Mt1	1.77131e-125	0.629276	0.83	0.695	3.35486e-121	2
Mt2	2.47834e-125	0.946682	0.512	0.259	4.69398e-121	2
mt-Nd2	6.62749e-49	0.451669	0.78	0.396	1.25525e-44	2
mt-Nd3	2.55658e-44	0.369087	0.227	0.087	4.84216e-40	2
Mtus2	1.30607e-15	0.164867	0.628	0.457	2.4737e-11	2
Nab1	5.7519e-29	0.173442	0.261	0.141	1.08941e-24	2
Nbeal1	4.28623e-51	0.212285	0.324	0.139	8.11812e-47	2
Ndel1	5.6483e-24	0.170765	0.27	0.158	1.06979e-19	2
Neat1	7.57304e-58	0.494364	0.445	0.246	1.43433e-53	2
Nfat5	3.76756e-34	0.176207	0.21	0.093	7.13575e-30	2
Nfe2l2	2.97567e-14	0.17125	0.179	0.115	5.63592e-10	2
Nfil3	8.53236e-152	0.542538	0.393	0.12	1.61603e-147	2
Nfkbia	5.07987e-80	0.642753	0.472	0.269	9.62127e-76	2
Npy1r	2.55325e-48	0.236879	0.32	0.152	4.83585e-44	2
Nr4a1	0	1.37102	0.873	0.268	0	2
Nr4a2	2.95808e-142	0.759946	0.519	0.237	5.60261e-138	2
Nr4a3	7.55422e-100	0.331664	0.15	0.022	1.43077e-95	2
Ntf3	2.87231e-12	0.14029	0.303	0.211	5.44015e-08	2
Ntrk3	2.57383e-40	0.172787	0.212	0.086	4.87483e-36	2
Odc1	6.5255e-14	0.150862	0.292	0.202	1.23593e-09	2
Pabpc1	1.74483e-23	0.227531	0.449	0.336	3.30471e-19	2
Pbx1	6.49088e-12	0.103034	0.229	0.148	1.22937e-07	2
Pcnp	1.26901e-16	0.106915	0.242	0.14	2.40351e-12	2
Pde3a	6.9859e-18	0.146319	0.325	0.203	1.32313e-13	2
Pde4b	1.55488e-183	0.650577	0.457	0.146	2.94495e-179	2
Peli1	8.4755e-48	0.245323	0.225	0.093	1.60526e-43	2
Pi15	1.07639e-14	0.109973	0.24	0.145	2.03868e-10	2
Pim1	4.54635e-43	0.323535	0.158	0.057	8.61079e-39	2
Plp2	2.14161e-10	0.129133	0.497	0.371	4.0562e-06	2
Plpp3	1.98655e-55	0.328099	0.375	0.19	3.76252e-51	2
Pnrc1	1.59437e-98	0.500866	0.416	0.184	3.01974e-94	2
Polr2c	7.96324e-09	0.102565	0.442	0.305	0.000150824	2
Ppp1r10	1.89292e-27	0.142435	0.145	0.062	3.5852e-23	2
Ppp1r15a	1.37444e-303	0.976828	0.594	0.16	2.60319e-299	2
Ptbp1	1.41574e-72	0.243568	0.278	0.093	2.68142e-68	2
Ptgs2	1.17654e-57	0.313183	0.163	0.048	2.22836e-53	2
Ptma	1.38996e-124	0.241484	0.99	0.96	2.63259e-120	2
Ptp4a1	2.24227e-50	0.294082	0.248	0.107	4.24686e-46	2
Ptprb	1.69517e-22	0.126012	0.174	0.084	3.21065e-18	2
Rad17	3.52599e-107	0.100434	0.189	0.032	6.67822e-103	2
Rap1b	1.06062e-09	0.113898	0.229	0.16	2.00881e-05	2
Rbbp6	2.21753e-14	0.109577	0.192	0.112	4.2e-10	2
Rbm39	1.9958e-43	0.264664	0.804	0.577	3.78005e-39	2
Rcan1	1.19476e-18	0.189586	0.157	0.085	2.26287e-14	2
Rgcc	8.61078e-38	0.233827	0.104	0.029	1.63088e-33	2
Rgs2	1.54291e-98	0.83124	0.442	0.211	2.92226e-94	2
Rhob	6.40332e-128	0.603299	0.635	0.351	1.21279e-123	2
Rpl10-ps3	1.68368e-60	0.232984	0.936	0.787	3.18889e-56	2
Rpl23a-ps3	3.58929e-60	0.279964	0.792	0.601	6.79811e-56	2
Rpl6l	1.54663e-51	0.234563	0.777	0.656	2.92932e-47	2
Rpl7a-ps5	2.38715e-37	0.219333	0.295	0.15	4.52125e-33	2
Rpl9-ps6	2.51883e-34	0.219603	0.721	0.574	4.77066e-30	2
Rps12-ps3	3.26394e-24	0.187009	0.749	0.594	6.18191e-20	2
Rspo3	1.08712e-81	0.100577	0.194	0.044	2.059e-77	2
Rsrc2	1.13043e-35	0.210013	0.372	0.203	2.14104e-31	2
S100a10	2.81714e-111	0.499996	0.665	0.417	5.33567e-107	2
S100a11	7.06514e-40	0.116999	0.99	0.968	1.33814e-35	2
Sat1	4.06988e-56	0.412403	0.544	0.345	7.70835e-52	2
Selk	2.95607e-14	0.114446	0.88	0.787	5.5988e-10	2
Senp6	3.68786e-14	0.108236	0.258	0.161	6.9848e-10	2
Serpinb6b	1.31737e-12	0.157083	0.185	0.122	2.4951e-08	2
Serpine1	2.88513e-116	0.715009	0.581	0.311	5.46443e-112	2
Sertad1	1.42136e-257	0.789512	0.491	0.121	2.69206e-253	2
Sgk1	7.96597e-185	0.820153	0.517	0.187	1.50875e-180	2
Slc1a5	2.204e-20	0.12295	0.176	0.088	4.17437e-16	2
Slc38a2	3.94528e-69	0.422484	0.507	0.278	7.47235e-65	2
Slc3a2	1.35926e-36	0.270126	0.268	0.14	2.57445e-32	2
Smad7	7.88051e-35	0.248648	0.205	0.097	1.49257e-30	2
Sncg	5.90242e-98	0.661443	0.402	0.171	1.11792e-93	2
Snhg12	5.07256e-35	0.179545	0.159	0.062	9.60742e-31	2
Socs3	1.78129e-111	0.723014	0.277	0.078	3.37377e-107	2
Srsf2	1.40872e-29	0.275037	0.35	0.213	2.66812e-25	2
Srsf7	4.52278e-30	0.214044	0.209	0.1	8.56615e-26	2
Stat3	4.04939e-31	0.225442	0.203	0.101	7.66955e-27	2
Svil	1.79086e-72	0.357613	0.426	0.199	3.39189e-68	2
Tgfb2	6.72148e-14	0.159741	0.249	0.162	1.27305e-09	2
Tgfbr1	9.49034e-12	0.133683	0.212	0.142	1.79747e-07	2
Timp4	5.03457e-50	0.193588	0.165	0.053	9.53547e-46	2
Tinagl1	3.39354e-40	0.255557	0.77	0.557	6.42736e-36	2
Tiparp	9.96631e-36	0.135872	0.104	0.03	1.88762e-31	2
Tmbim6	2.59168e-10	0.133173	0.498	0.37	4.90864e-06	2
Tmcc3	3.4058e-36	0.171331	0.219	0.099	6.45059e-32	2
Tob1	1.51288e-76	0.339302	0.208	0.058	2.8654e-72	2
Tob2	2.91245e-29	0.213599	0.265	0.146	5.51618e-25	2
Top1	2.09772e-20	0.186197	0.346	0.228	3.97309e-16	2
Tpm4	2.45994e-30	0.265543	0.409	0.271	4.65912e-26	2
Tppp3	1.21967e-46	0.313066	0.734	0.563	2.31006e-42	2
Tra2b	1.53097e-24	0.214588	0.459	0.312	2.89966e-20	2
Trappc6b	6.12728e-21	0.132207	0.342	0.199	1.16051e-16	2
Trib1	2.17112e-67	0.205159	0.141	0.031	4.1121e-63	2
Tubb6	5.04172e-47	0.302464	0.396	0.213	9.54902e-43	2
Txn1	1.00442e-30	0.171832	0.918	0.8	1.90236e-26	2
Uap1	4.43879e-40	0.219439	0.201	0.085	8.40708e-36	2
Ubc	4.97067e-162	0.287727	0.995	0.954	9.41444e-158	2
Ube2e3	4.75497e-17	0.132053	0.278	0.172	9.00592e-13	2
Usp2	1.32287e-44	0.141231	0.121	0.034	2.50551e-40	2
Wdr89	2.33064e-19	0.161527	0.735	0.605	4.41423e-15	2
Zbtb20	1.26755e-49	0.230367	0.884	0.754	2.40074e-45	2
Zcchc11	5.00427e-100	0.100446	0.178	0.03	9.47808e-96	2
Zfand5	2.05152e-72	0.374473	0.333	0.143	3.88557e-68	2
Zfp131	4.4471e-35	0.137792	0.138	0.049	8.42281e-31	2
Zfp36	4.32982e-259	1.0649	0.461	0.106	8.20069e-255	2
Zfp36l1	6.4223e-40	0.280026	0.496	0.292	1.21638e-35	2
Znrd1	2.0259e-18	0.119259	0.204	0.112	3.83705e-14	2
Fn1	4.38421e-268	0.856735	0.908	0.573	8.3037e-264	3
Lgals1	1.76843e-229	0.217644	1	1	3.34941e-225	3
Fxyd5	2.29072e-175	0.680338	0.46	0.133	4.33862e-171	3
Anxa2	2.66953e-143	0.461222	0.913	0.691	5.05609e-139	3
Postn	2.69579e-141	0.405123	0.949	0.807	5.10582e-137	3
Cyb5r3	1.43104e-132	0.28445	0.983	0.904	2.71038e-128	3
Anxa1	9.61526e-131	0.586028	0.751	0.442	1.82113e-126	3
Mustn1	1.02876e-127	0.439458	0.948	0.799	1.94847e-123	3
Mgp	2.07207e-110	0.643663	1	0.999	3.92451e-106	3
Tspo	5.08545e-97	0.237964	0.972	0.908	9.63184e-93	3
Igfbp7	6.88679e-94	0.143261	1	1	1.30436e-89	3
Crlf1	1.32635e-87	0.377867	0.254	0.074	2.51211e-83	3
Nupr1	8.50844e-80	0.255651	0.994	0.967	1.6115e-75	3
Vcam1	8.56285e-80	0.616818	0.139	0.024	1.6218e-75	3
Tmsb4x	1.02808e-73	0.120346	1	1	1.94717e-69	3
Emp3	1.26471e-71	0.268323	0.92	0.775	2.39536e-67	3
Ahnak2	1.64566e-66	0.400114	0.55	0.321	3.11687e-62	3
Anxa3	8.0361e-61	0.391121	0.592	0.374	1.52204e-56	3
Col18a1	6.86862e-60	0.20034	0.948	0.87	1.30092e-55	3
Timp1	1.85011e-57	0.644699	0.179	0.053	3.50412e-53	3
Rtn4	2.46446e-51	0.372214	0.677	0.491	4.66769e-47	3
Hspb7	2.06412e-50	0.272208	0.815	0.654	3.90944e-46	3
Cd109	5.01016e-49	0.158841	0.165	0.05	9.48925e-45	3
Igfbp2	1.66897e-47	0.600682	0.197	0.072	3.16102e-43	3
Arpc1b	9.94611e-42	0.230711	0.9	0.793	1.88379e-37	3
Acan	1.51412e-41	0.194625	0.178	0.064	2.86774e-37	3
Plaur	1.85978e-41	0.142695	0.135	0.04	3.52243e-37	3
Sulf1	4.3627e-40	0.267966	0.275	0.132	8.26295e-36	3
Ankrd1	1.28765e-38	0.25514	0.158	0.056	2.43881e-34	3
Cd81	1.62439e-37	0.143849	0.981	0.943	3.07659e-33	3
Scn1b	9.14162e-36	0.253445	0.304	0.156	1.73142e-31	3
Col6a3	1.32139e-35	0.27222	0.345	0.19	2.50271e-31	3
Aqp1	3.91955e-35	0.275658	0.635	0.469	7.42362e-31	3
Col4a2	6.70895e-35	0.273803	0.552	0.386	1.27067e-30	3
Creb3l1	8.34587e-35	0.151117	0.223	0.098	1.58071e-30	3
Fhl1	2.19722e-33	0.159978	0.971	0.951	4.16153e-29	3
Flnc	6.63521e-33	0.277304	0.313	0.171	1.25671e-28	3
Scx	5.42742e-32	0.12587	0.131	0.046	1.02795e-27	3
Tnc	3.64484e-31	0.161315	0.146	0.057	6.90332e-27	3
Cd63	4.63203e-31	0.102718	0.985	0.978	8.77307e-27	3
Cdh13	7.84866e-31	0.22349	0.755	0.596	1.48654e-26	3
Qsox1	4.06161e-30	0.240172	0.658	0.505	7.6927e-26	3
Clic1	7.94979e-30	0.22867	0.706	0.561	1.50569e-25	3
Card19	1.82529e-29	0.262711	0.454	0.31	3.45709e-25	3
Iqgap1	2.55706e-28	0.24121	0.427	0.273	4.84308e-24	3
Nme1	3.82615e-28	0.246107	0.436	0.276	7.24672e-24	3
Pdgfa	2.10032e-27	0.23432	0.578	0.419	3.97802e-23	3
Nes	2.1815e-27	0.228716	0.318	0.187	4.13177e-23	3
B2m	3.52398e-27	0.151023	0.929	0.865	6.67442e-23	3
Actn4	3.09856e-26	0.173485	0.832	0.742	5.86868e-22	3
Plpp1	1.46902e-25	0.244041	0.476	0.335	2.78233e-21	3
Crlf2	4.54805e-25	0.192466	0.229	0.12	8.614e-21	3
Pdgfc	1.13946e-24	0.101518	0.122	0.048	2.15813e-20	3
Pitpna	3.22379e-24	0.198911	0.366	0.222	6.10586e-20	3
Gpx8	9.27913e-24	0.235283	0.514	0.377	1.75747e-19	3
Rexo2	9.31938e-24	0.145958	0.864	0.781	1.76509e-19	3
Ppp1r14b	9.48459e-24	0.163593	0.24	0.131	1.79638e-19	3
Cgref1	9.50957e-23	0.104373	0.135	0.058	1.80111e-18	3
Dap	1.10324e-22	0.210061	0.617	0.472	2.08954e-18	3
Cd44	1.40445e-22	0.10402	0.104	0.039	2.66003e-18	3
Col5a2	1.7849e-22	0.212123	0.304	0.184	3.3806e-18	3
Capg	5.84963e-22	0.15142	0.206	0.107	1.10792e-17	3
Uqcc2	1.76873e-21	0.206907	0.545	0.414	3.34998e-17	3
Anxa7	2.89714e-21	0.2062	0.434	0.301	5.48719e-17	3
Glud1	3.38176e-21	0.189144	0.335	0.204	6.40505e-17	3
Rnh1	6.1365e-21	0.213031	0.498	0.357	1.16225e-16	3
Phlda3	7.06679e-21	0.232787	0.241	0.141	1.33845e-16	3
Arhgdia	9.57017e-21	0.159248	0.786	0.669	1.81259e-16	3
Tagln2	1.08513e-20	0.126666	0.953	0.919	2.05524e-16	3
Ctsh	8.24788e-20	0.210771	0.564	0.432	1.56215e-15	3
Elovl1	1.41044e-19	0.203616	0.326	0.213	2.67137e-15	3
Tm4sf1	2.05989e-19	0.134105	0.954	0.934	3.90144e-15	3
Plec	2.37242e-19	0.164323	0.204	0.113	4.49336e-15	3
Vat1	8.7195e-19	0.180323	0.301	0.192	1.65147e-14	3
Lxn	3.44111e-18	0.185832	0.333	0.221	6.51746e-14	3
Myoz2	3.61462e-18	0.128478	0.194	0.106	6.84609e-14	3
Sh3bgrl3	4.85853e-18	0.182963	0.622	0.485	9.20206e-14	3
Trim47	5.60267e-18	0.193761	0.468	0.341	1.06115e-13	3
Loxl1	5.60397e-18	0.175564	0.669	0.539	1.06139e-13	3
Bola2	6.27877e-17	0.157887	0.281	0.175	1.1892e-12	3
Clic4	1.66984e-16	0.155991	0.727	0.607	3.16268e-12	3
Fads3	2.697e-16	0.156655	0.268	0.174	5.10811e-12	3
Fgf2	2.87697e-16	0.120099	0.182	0.102	5.44898e-12	3
Tspan4	2.37497e-15	0.161101	0.26	0.164	4.49819e-11	3
Ppp1r18	8.40948e-15	0.168898	0.365	0.26	1.59275e-10	3
Arl6ip5	1.02169e-14	0.161729	0.645	0.531	1.93509e-10	3
Lrp1	1.29615e-14	0.160227	0.41	0.286	2.4549e-10	3
Cnih4	1.69627e-14	0.133534	0.207	0.123	3.21273e-10	3
Atox1	1.95504e-14	0.15157	0.7	0.59	3.70285e-10	3
Col4a1	3.29028e-14	0.17051	0.559	0.457	6.23179e-10	3
Surf4	3.65172e-14	0.13996	0.274	0.176	6.91636e-10	3
Tmem43	6.17989e-14	0.152199	0.326	0.223	1.17047e-09	3
Ctnnb1	1.17915e-13	0.165272	0.478	0.369	2.23331e-09	3
Cav3	1.48939e-13	0.178142	0.301	0.215	2.82091e-09	3
Itgb5	1.69943e-13	0.13152	0.75	0.681	3.21872e-09	3
Dbp	2.5578e-13	0.197014	0.264	0.178	4.84447e-09	3
Glg1	3.43786e-13	0.147706	0.366	0.257	6.5113e-09	3
Prnp	5.29899e-13	0.13817	0.221	0.143	1.00363e-08	3
Ssr4	1.08292e-12	0.134291	0.734	0.631	2.05105e-08	3
Creb3	1.52829e-12	0.122885	0.257	0.167	2.89458e-08	3
Pmepa1	2.06888e-12	0.147881	0.672	0.574	3.91846e-08	3
Itgbl1	2.07737e-12	0.171615	0.351	0.254	3.93454e-08	3
Myo1c	2.10544e-12	0.159895	0.433	0.327	3.9877e-08	3
Nhp2	3.35949e-12	0.129587	0.218	0.139	6.36287e-08	3
Cspg4	9.10246e-12	0.166304	0.383	0.297	1.72401e-07	3
Itga3	1.05062e-11	0.1245	0.196	0.126	1.98987e-07	3
Srm	1.6014e-11	0.127265	0.252	0.171	3.03305e-07	3
Comp	5.66534e-11	0.108952	0.113	0.061	1.07302e-06	3
Pacsin2	7.50364e-11	0.127067	0.267	0.183	1.42119e-06	3
Ehd2	7.5704e-11	0.147201	0.564	0.474	1.43383e-06	3
Psmd8	8.95129e-11	0.127787	0.702	0.606	1.69537e-06	3
Acot9	9.34861e-11	0.106685	0.221	0.143	1.77063e-06	3
Ifngr2	1.01563e-10	0.131576	0.289	0.21	1.92361e-06	3
Pdcd6ip	1.28943e-10	0.10092	0.189	0.121	2.44218e-06	3
Psmd11	1.30704e-10	0.130294	0.335	0.24	2.47554e-06	3
Yif1a	3.5669e-10	0.117814	0.273	0.189	6.7557e-06	3
Ostc	3.93299e-10	0.135222	0.413	0.321	7.44909e-06	3
Vti1b	5.55576e-10	0.134676	0.497	0.415	1.05226e-05	3
Rock2	6.31054e-10	0.121338	0.28	0.2	1.19522e-05	3
Calu	8.19599e-10	0.140145	0.497	0.403	1.55232e-05	3
Ccdc124	9.33571e-10	0.128793	0.491	0.397	1.76818e-05	3
Tspan2	1.33771e-09	0.135322	0.38	0.299	2.53362e-05	3
St3gal2	1.56915e-09	0.113041	0.236	0.168	2.97197e-05	3
Tmed3	1.6385e-09	0.126022	0.674	0.58	3.10333e-05	3
Fgfr1	1.85963e-09	0.109006	0.254	0.179	3.52214e-05	3
Ppp1ca	3.0588e-09	0.126734	0.601	0.521	5.79337e-05	3
Tmbim1	3.65875e-09	0.12527	0.322	0.24	6.92967e-05	3
Pold4	4.13109e-09	0.130617	0.339	0.255	7.82429e-05	3
Txndc17	1.51748e-08	0.123518	0.51	0.422	0.000287411	3
Tm9sf3	1.69453e-08	0.110213	0.301	0.22	0.000320945	3
Lamb2	1.7399e-08	0.120842	0.654	0.565	0.000329538	3
1110008P14Rik	2.30346e-08	0.118709	0.281	0.208	0.000436276	3
Mydgf	2.9533e-08	0.110975	0.338	0.254	0.000559355	3
Kazald1	3.21746e-08	0.110644	0.23	0.166	0.000609387	3
Fam198b	3.68929e-08	0.119977	0.351	0.272	0.000698752	3
Fbn1	4.56387e-08	0.10849	0.301	0.223	0.000864396	3
Prelid1	5.4152e-08	0.123212	0.51	0.442	0.00102564	3
Kdelr3	5.44407e-08	0.111482	0.3	0.226	0.00103111	3
Sec61b	7.48893e-08	0.109786	0.728	0.655	0.0014184	3
H13	9.36518e-08	0.125717	0.328	0.256	0.00177377	3
Pea15a	1.25899e-07	0.111538	0.37	0.291	0.00238454	3
Cltb	1.30973e-07	0.118463	0.556	0.462	0.00248063	3
Tgfb1	1.44533e-07	0.109085	0.187	0.133	0.00273745	3
S100a16	1.52711e-07	0.11857	0.483	0.396	0.00289234	3
Erp29	2.54028e-07	0.102386	0.37	0.285	0.00481128	3
P4hb	3.18325e-07	0.118479	0.46	0.385	0.00602907	3
Txndc5	3.45259e-07	0.109496	0.42	0.345	0.0065392	3
Serpini1	3.56933e-07	0.106459	0.278	0.212	0.00676032	3
Arpc3	4.47914e-07	0.109922	0.548	0.458	0.00848349	3
H2afj	5.02541e-07	0.103871	0.476	0.399	0.00951812	3
Sar1a	7.05354e-07	0.107893	0.368	0.292	0.0133594	3
Chmp4b	9.98167e-07	0.102589	0.548	0.45	0.0189053	3
Copz2	1.83749e-06	0.105758	0.592	0.512	0.0348021	3
Arf4	2.47687e-06	0.103449	0.487	0.404	0.0469118	3
Ace	4.51939e-20	0.201962	0.262	0.155	8.55972e-16	3
Ahnak	5.55951e-15	0.171639	0.637	0.518	1.05297e-10	3
Anxa5	7.223e-22	0.176015	0.833	0.719	1.36804e-17	3
Ccdc3	4.93725e-35	0.256849	0.752	0.59	9.35116e-31	3
Cd151	1.90223e-26	0.192781	0.753	0.632	3.60282e-22	3
Cdo1	1.35107e-46	0.323988	0.356	0.184	2.55893e-42	3
Col15a1	3.762e-42	0.302681	0.563	0.371	7.12522e-38	3
Col1a1	6.51052e-71	0.410462	0.701	0.429	1.23309e-66	3
Eln	1.80578e-63	0.279014	0.982	0.949	3.42015e-59	3
Emp2	3.04088e-07	0.109205	0.471	0.39	0.00575943	3
Eno1	4.80907e-12	0.15103	0.577	0.478	9.10838e-08	3
Esam	4.5358e-11	0.127019	0.189	0.121	8.59081e-07	3
Gja1	1.86059e-12	0.118455	0.199	0.125	3.52396e-08	3
Gm13889	3.37477e-18	0.206074	0.633	0.501	6.39182e-14	3
Hspg2	5.30057e-21	0.193126	0.662	0.544	1.00393e-16	3
Itga5	7.38418e-89	0.535127	0.474	0.224	1.39856e-84	3
Lgals3	2.8482e-78	0.540938	0.402	0.175	5.39449e-74	3
Lmna	6.18334e-26	0.164793	0.879	0.776	1.17113e-21	3
Ltbp3	2.4484e-12	0.1512	0.367	0.268	4.63727e-08	3
Map2k3	1.59961e-19	0.185495	0.301	0.185	3.02967e-15	3
Mfge8	1.29587e-78	0.16992	0.996	0.984	2.45437e-74	3
Msn	5.58579e-42	0.289929	0.727	0.53	1.05795e-37	3
Pdia6	1.74583e-08	0.120987	0.434	0.347	0.00033066	3
Por	2.15765e-09	0.105031	0.235	0.161	4.08659e-05	3
Prss23	3.10831e-118	0.533137	0.781	0.506	5.88714e-114	3
S100a4	1.55716e-148	0.602372	0.856	0.547	2.94927e-144	3
S100a6	2.78613e-111	0.208986	0.999	0.991	5.27694e-107	3
Sfxn3	2.99095e-09	0.102786	0.167	0.109	5.66486e-05	3
Sparc	2.94427e-66	0.176118	1	0.999	5.57644e-62	3
Tmsb10	7.99971e-54	0.360829	0.664	0.436	1.51514e-49	3
Tnfrsf12a	1.01212e-59	0.371007	0.777	0.581	1.91696e-55	3
Tuba1a	2.56329e-12	0.156049	0.756	0.675	4.85488e-08	3
Tubb2a	1.43308e-23	0.216082	0.316	0.188	2.71426e-19	3
Uchl1	8.07866e-46	0.331225	0.593	0.402	1.5301e-41	3
Slc39a1	0	1.1249	0.618	0.045	0	4
Actb	1.34712e-200	0.950578	1	0.89	2.55144e-196	4
Notch2	9.5274e-99	0.344036	0.188	0.017	1.80449e-94	4
Rpgrip1	7.16884e-64	0.140708	0.113	0.009	1.35778e-59	4
Abhd2	3.57821e-57	0.163518	0.113	0.011	6.77712e-53	4
Ncoa3	2.53292e-38	0.245396	0.173	0.037	4.79735e-34	4
Alkbh5	1.85139e-33	0.228528	0.148	0.031	3.50654e-29	4
Spry2	1.77686e-32	0.131289	0.101	0.015	3.36537e-28	4
Zscan26	5.18037e-29	0.11048	0.101	0.017	9.81163e-25	4
Wtap	2.26348e-17	0.177426	0.141	0.046	4.28704e-13	4
Tubb5	2.11793e-13	0.244612	0.764	0.609	4.01135e-09	4
Marf1	5.61756e-13	0.134368	0.118	0.041	1.06397e-08	4
Tmf1	1.71936e-08	0.1417	0.123	0.056	0.000325646	4
Inpp4a	7.66382e-08	0.121344	0.131	0.063	0.00145153	4
Arglu1	4.23458e-07	0.115676	0.106	0.049	0.00802029	4
St13	1.39438e-06	0.160387	0.322	0.215	0.0264095	4
Cbx3	3.63554e-90	0.541496	0.367	0.075	6.88571e-86	4	1
Dusp3	1.68785e-25	0.410977	0.402	0.199	3.19678e-21	4	2
Gnb1	3.72444e-52	0.524834	0.631	0.296	7.05409e-48	4	3
Kdelr2	3.25963e-110	0.769139	0.573	0.155	6.17374e-106	4	4
Lrrc8a	2.85622e-53	0.444919	0.332	0.095	5.40968e-49	4	5
Nfia	1.0112e-125	0.789157	0.442	0.08	1.91521e-121	4	6
Pam	0	1.69868	0.769	0.104	0	4	7
Sdc4	2.90316e-44	0.511737	0.487	0.195	5.49858e-40	4	8
Dusp16	2.26359e-96	0.115336	0.136	0.007	4.28723e-92	5
Rnf214	2.1368e-77	0.182391	0.245	0.033	4.04711e-73	5
Cdk13	8.3922e-77	0.14554	0.183	0.018	1.58948e-72	5
Btaf1	7.38035e-73	0.106445	0.115	0.007	1.39784e-68	5
Slc16a11	4.33594e-72	0.123749	0.15	0.013	8.21228e-68	5
Nsun5	1.47874e-71	0.106842	0.127	0.009	2.80073e-67	5
Akap2	2.49977e-70	0.123173	0.147	0.013	4.73456e-66	5
Fem1b	2.68633e-69	0.155938	0.195	0.023	5.0879e-65	5
Rap1gap2	1.6444e-66	0.111201	0.127	0.01	3.1145e-62	5
Cdyl	2.17776e-66	0.144762	0.192	0.023	4.12469e-62	5
Ubr7	8.62633e-65	0.116135	0.15	0.015	1.63383e-60	5
Telo2	7.36648e-64	0.12498	0.165	0.018	1.39521e-59	5
Dzip1l	5.27192e-61	0.115609	0.147	0.015	9.98501e-57	5
Kctd6	4.95275e-60	0.11806	0.142	0.014	9.38051e-56	5
4833412C05Rik	1.3e-58	0.183739	0.215	0.034	2.46219e-54	5
Nipa2	9.85435e-55	0.164152	0.224	0.039	1.86641e-50	5
Gulp1	4.27586e-54	0.143076	0.192	0.029	8.09848e-50	5
Upf1	7.19376e-54	0.13919	0.198	0.03	1.3625e-49	5
Gucd1	2.80216e-53	0.142508	0.198	0.031	5.30728e-49	5
Tlcd1	3.40177e-53	0.124778	0.165	0.022	6.44294e-49	5
Abhd6	4.3874e-53	0.119228	0.139	0.016	8.30974e-49	5
Zfp652	2.88772e-52	0.128761	0.174	0.025	5.46934e-48	5
Snx27	3.70429e-52	0.123208	0.153	0.019	7.01592e-48	5
Arhgef10l	6.13791e-52	0.167878	0.233	0.042	1.16252e-47	5
Cdon	7.04639e-52	0.11201	0.145	0.017	1.33459e-47	5
B4galt3	2.83457e-51	0.184087	0.265	0.055	5.36868e-47	5
Synj2	4.27438e-51	0.119304	0.153	0.02	8.09568e-47	5
Zc3h7b	5.55142e-51	0.155142	0.218	0.039	1.05144e-46	5
Ccdc97	6.43261e-51	0.113382	0.159	0.021	1.21834e-46	5
Siah1a	1.95188e-50	0.130179	0.192	0.031	3.69686e-46	5
Ddx55	3.7147e-50	0.105724	0.147	0.018	7.03564e-46	5
Scap	5.09965e-50	0.106918	0.153	0.02	9.65874e-46	5
Bin3	7.8654e-50	0.118795	0.162	0.023	1.48971e-45	5
Casc3	1.57106e-49	0.10048	0.13	0.015	2.97559e-45	5
Mettl6	2.2693e-49	0.118431	0.159	0.022	4.29806e-45	5
Nphp1	1.59579e-48	0.118515	0.153	0.021	3.02242e-44	5
Dpp9	2.75618e-48	0.174303	0.251	0.053	5.2202e-44	5
Pdzd2	4.42181e-48	0.167864	0.263	0.057	8.3749e-44	5
Zbtb1	9.59696e-48	0.119267	0.147	0.02	1.81766e-43	5
Cbfa2t2	1.31517e-47	0.117054	0.156	0.022	2.49093e-43	5
Gltscr1l	2.37396e-47	0.108208	0.13	0.015	4.49628e-43	5
Exoc6b	9.38281e-47	0.126116	0.201	0.035	1.7771e-42	5
Clasp1	3.63566e-46	0.126613	0.162	0.024	6.88593e-42	5
Iqcb1	3.73281e-46	0.11336	0.15	0.021	7.06993e-42	5
Rai1	5.1941e-46	0.10409	0.133	0.017	9.83762e-42	5
Zfyve27	7.33093e-46	0.113522	0.165	0.025	1.38848e-41	5
Spata6	9.25868e-46	0.110507	0.145	0.02	1.75359e-41	5
Nploc4	1.78804e-45	0.119816	0.159	0.024	3.38654e-41	5
Tmem131	4.4664e-45	0.112877	0.145	0.02	8.45937e-41	5
Mtmr3	6.82693e-45	0.118402	0.15	0.022	1.29302e-40	5
Ralgapa2	8.9953e-45	0.138843	0.189	0.034	1.70371e-40	5
Ece2	1.19553e-44	0.113389	0.168	0.027	2.26433e-40	5
Pus1	1.82872e-44	0.10156	0.142	0.019	3.4636e-40	5
Atad3a	3.46307e-44	0.127636	0.183	0.031	6.55906e-40	5
Rab11fip2	6.1808e-44	0.156873	0.236	0.051	1.17064e-39	5
Uxs1	7.96698e-44	0.129596	0.162	0.025	1.50895e-39	5
Rab31	8.43183e-44	0.129257	0.18	0.031	1.59699e-39	5
Plxnb1	1.57413e-43	0.113461	0.142	0.02	2.9814e-39	5
Rfxank	1.91456e-43	0.100973	0.127	0.016	3.62618e-39	5
Gpsm1	1.86801e-42	0.109242	0.15	0.023	3.538e-38	5
Cep170	2.78818e-42	0.101929	0.118	0.014	5.28081e-38	5
Tnip2	5.80498e-42	0.125575	0.162	0.027	1.09946e-37	5
Pnpo	5.9379e-42	0.101187	0.13	0.017	1.12464e-37	5
Abt1	1.64943e-41	0.140234	0.204	0.041	3.12401e-37	5
Vmac	2.8318e-41	0.128365	0.192	0.036	5.36343e-37	5
Ate1	6.39234e-41	0.137078	0.212	0.044	1.21071e-36	5
Cdk10	7.20819e-41	0.14987	0.236	0.052	1.36523e-36	5
Rab27b	8.21019e-41	0.126642	0.156	0.025	1.55501e-36	5
Ghdc	8.87854e-41	0.111546	0.147	0.023	1.68159e-36	5
Brox	1.43641e-40	0.112236	0.168	0.029	2.72056e-36	5
Zfp513	2.81593e-40	0.126561	0.192	0.038	5.33338e-36	5
Tbcel	6.90056e-40	0.119241	0.156	0.026	1.30697e-35	5
Ilf3	2.2284e-39	0.104549	0.142	0.022	4.22059e-35	5
Xrcc6	2.97211e-39	0.118164	0.174	0.032	5.62917e-35	5
AI987944	4.19246e-39	0.106886	0.133	0.02	7.94051e-35	5
Spast	1.17891e-38	0.111275	0.142	0.022	2.23285e-34	5
Pi4k2a	1.875e-38	0.112618	0.159	0.027	3.55125e-34	5
Rnf141	2.44594e-38	0.1062	0.147	0.024	4.6326e-34	5
Lrig1	2.81346e-38	0.109023	0.139	0.022	5.3287e-34	5
Men1	3.39155e-38	0.106338	0.147	0.024	6.4236e-34	5
Zbtb22	3.91094e-38	0.14037	0.227	0.053	7.40733e-34	5
Dedd	5.35698e-38	0.133004	0.204	0.043	1.01461e-33	5
Trmt6	6.6134e-38	0.124105	0.18	0.035	1.25258e-33	5
Sin3a	7.49557e-38	0.116606	0.159	0.029	1.41966e-33	5
Atp10a	1.27277e-37	0.120729	0.174	0.033	2.41063e-33	5
Mink1	2.34775e-37	0.110759	0.139	0.022	4.44665e-33	5
Zfand2a	4.19969e-37	0.107683	0.139	0.023	7.9542e-33	5
Thumpd1	5.25351e-37	0.123553	0.195	0.04	9.95015e-33	5
Rab10os	6.26007e-37	0.110533	0.145	0.024	1.18566e-32	5
Stk3	7.99461e-37	0.138322	0.224	0.054	1.51418e-32	5
Foxn2	8.23124e-37	0.111449	0.142	0.024	1.559e-32	5
Tbc1d12	8.25662e-37	0.143428	0.198	0.043	1.5638e-32	5
Ndst1	2.15234e-36	0.115685	0.177	0.035	4.07653e-32	5
Rbm26	2.81171e-36	0.117968	0.168	0.032	5.32537e-32	5
Naprt	3.92694e-36	0.123754	0.165	0.032	7.43763e-32	5
2900089D17Rik	3.96652e-36	0.118467	0.156	0.029	7.5126e-32	5
Pex7	1.29377e-35	0.12084	0.204	0.046	2.4504e-31	5
Mgmt	6.01526e-35	0.125814	0.221	0.052	1.13929e-30	5
A830080D01Rik	8.56819e-35	0.106469	0.124	0.019	1.62282e-30	5
Morc2a	1.04858e-34	0.110139	0.142	0.025	1.98601e-30	5
Akap17b	1.65684e-34	0.116661	0.153	0.029	3.13805e-30	5
Polr3c	1.70586e-34	0.109236	0.153	0.028	3.23089e-30	5
Spen	1.70597e-34	0.102088	0.133	0.022	3.23111e-30	5
Vps13d	2.07204e-34	0.111317	0.171	0.034	3.92444e-30	5
Sult1a1	2.79927e-34	0.113294	0.171	0.034	5.30182e-30	5
Cntln	5.59563e-34	0.10279	0.156	0.029	1.05981e-29	5
Ttc7b	2.02247e-33	0.113851	0.159	0.031	3.83056e-29	5
Pofut1	3.524e-33	0.113624	0.168	0.034	6.67446e-29	5
Uvrag	4.68145e-33	0.123489	0.174	0.037	8.86666e-29	5
Atg13	6.69342e-33	0.114195	0.186	0.041	1.26773e-28	5
Arhgap23	1.93249e-32	0.110792	0.153	0.031	3.66013e-28	5
Stx2	2.07239e-32	0.102276	0.139	0.025	3.9251e-28	5
Tbc1d1	2.07576e-32	0.127213	0.186	0.041	3.9315e-28	5
Mpg	2.52468e-32	0.116384	0.198	0.045	4.78175e-28	5
Fasn	4.23671e-32	0.102573	0.142	0.027	8.02433e-28	5
Gtf2f2	4.54089e-32	0.105123	0.147	0.028	8.60045e-28	5
Tceal1	5.46038e-32	0.126808	0.227	0.06	1.0342e-27	5
Rbm34	6.00308e-32	0.120103	0.183	0.04	1.13698e-27	5
Heatr6	8.0428e-32	0.114639	0.183	0.04	1.52331e-27	5
Tatdn1	8.88863e-32	0.10307	0.162	0.033	1.68351e-27	5
B3galt1	1.80683e-31	0.125139	0.177	0.039	3.42214e-27	5
Zbed3	2.05658e-31	0.136523	0.206	0.053	3.89516e-27	5
Pomgnt2	2.52783e-31	0.112105	0.183	0.042	4.78771e-27	5
Gfm1	3.4347e-31	0.141976	0.239	0.065	6.50532e-27	5
Rabepk	4.59257e-31	0.117201	0.186	0.042	8.69834e-27	5
Lysmd3	9.11475e-31	0.140117	0.174	0.04	1.72633e-26	5
Fmnl3	9.27214e-31	0.116449	0.198	0.047	1.75614e-26	5
Mospd1	3.25982e-30	0.112916	0.162	0.035	6.17409e-26	5
Fbxo34	3.64072e-30	0.100963	0.142	0.028	6.89553e-26	5
Cc2d1b	5.92034e-30	0.107828	0.153	0.032	1.12131e-25	5
Aak1	9.845e-30	0.121054	0.165	0.038	1.86464e-25	5
Gpc4	1.49037e-29	0.129469	0.209	0.054	2.82275e-25	5
Bhlhb9	1.71395e-29	0.11784	0.174	0.041	3.24623e-25	5
Cyp51	1.07693e-28	0.131544	0.192	0.048	2.03971e-24	5
Wipf2	1.37158e-28	0.103563	0.147	0.031	2.59777e-24	5
Zfp950	1.77225e-28	0.124953	0.201	0.053	3.35664e-24	5
Map3k10	8.24773e-28	0.102446	0.18	0.044	1.56212e-23	5
Mavs	1.4962e-27	0.115427	0.198	0.054	2.8338e-23	5
Fam20b	1.70634e-27	0.10108	0.153	0.035	3.23181e-23	5
Lrrc47	1.9185e-27	0.107317	0.153	0.034	3.63364e-23	5
Fam84a	1.98734e-27	0.108443	0.142	0.03	3.76402e-23	5
Rpa2	2.92251e-27	0.114903	0.177	0.044	5.53523e-23	5
Rfesd	4.81287e-27	0.112484	0.186	0.049	9.11557e-23	5
Pth1r	6.92502e-27	0.111966	0.165	0.04	1.3116e-22	5
Gm15912	2.38774e-26	0.106592	0.142	0.032	4.52237e-22	5
Mon2	6.63152e-26	0.104667	0.174	0.044	1.25601e-21	5
0610030E20Rik	1.72233e-25	0.113195	0.171	0.043	3.26209e-21	5
Optn	2.19283e-25	0.104424	0.168	0.041	4.15323e-21	5
Ppp2r3a	2.70835e-25	0.104832	0.142	0.031	5.12962e-21	5
Ccnk	4.21363e-25	0.10009	0.136	0.03	7.98062e-21	5
4931406P16Rik	7.90599e-25	0.107094	0.15	0.037	1.49739e-20	5
Nup85	1.68903e-24	0.115931	0.201	0.059	3.19903e-20	5
Wsb1	4.05021e-24	0.301026	0.206	0.067	7.6711e-20	5
Dstyk	1.38735e-23	0.102796	0.118	0.025	2.62765e-19	5
Klf16	2.28823e-23	0.103737	0.145	0.035	4.3339e-19	5
Ier5l	3.70258e-23	0.109148	0.133	0.032	7.01268e-19	5
Epb41l2	4.75863e-23	0.115369	0.162	0.044	9.01285e-19	5
2310033P09Rik	2.89785e-22	0.110458	0.239	0.076	5.48853e-18	5
Rcor1	7.52651e-22	0.10565	0.142	0.037	1.42552e-17	5
Bcl7c	1.19052e-20	0.2653	0.324	0.134	2.25485e-16	5
Fam160b1	2.53736e-19	0.126908	0.236	0.089	4.80575e-15	5
Spryd7	5.01853e-19	0.127362	0.186	0.064	9.50509e-15	5
Rpl23a	4.39335e-18	0.106095	1	0.998	8.32101e-14	5
Sfpq	7.79592e-18	0.247496	0.245	0.096	1.47655e-13	5
Per1	9.2459e-18	0.197131	0.156	0.051	1.75117e-13	5
Hnrnpu	4.19443e-17	0.261723	0.319	0.144	7.94425e-13	5
Hmces	5.27352e-16	0.100331	0.156	0.053	9.98805e-12	5
Rnf10	6.70218e-16	0.258902	0.463	0.241	1.26939e-11	5
Rassf1	1.31419e-15	0.284344	0.254	0.121	2.48908e-11	5
Kmt2e	3.35159e-15	0.259341	0.381	0.193	6.34791e-11	5
Tex264	5.84074e-15	0.217557	0.351	0.164	1.10624e-10	5
Atxn7	6.20559e-15	0.224196	0.118	0.036	1.17534e-10	5
Camk2d	2.83749e-14	0.25056	0.369	0.184	5.3742e-10	5
Desi2	3.97542e-14	0.226977	0.295	0.14	7.52945e-10	5
Ssr1	5.63725e-13	0.240159	0.378	0.201	1.0677e-08	5
Tacc2	1.24539e-12	0.222078	0.319	0.16	2.35877e-08	5
Ggnbp2	2.08091e-12	0.210212	0.271	0.131	3.94124e-08	5
Scarb2	2.78294e-12	0.233232	0.286	0.144	5.27088e-08	5
Hdac5	4.38721e-12	0.190094	0.218	0.096	8.30937e-08	5
Rassf3	6.84349e-12	0.253589	0.398	0.231	1.29616e-07	5
Tpm3	9.14365e-12	0.212528	0.248	0.12	1.73181e-07	5
Heyl	1.01231e-11	0.247872	0.345	0.192	1.91732e-07	5
Ppig	8.45771e-11	0.221015	0.389	0.226	1.60189e-06	5
Lzts2	1.07879e-10	0.204649	0.333	0.182	2.04322e-06	5
Rbms1	1.21196e-10	0.206106	0.265	0.143	2.29544e-06	5
Maf1	1.29293e-10	0.205873	0.44	0.244	2.44881e-06	5
Dnaja2	1.65011e-10	0.217655	0.327	0.184	3.12531e-06	5
Rps26-ps1	2.75247e-10	0.213462	0.292	0.172	5.21319e-06	5
Rnase4	3.95048e-10	0.195699	0.236	0.119	7.48221e-06	5
Oser1	6.97833e-10	0.180768	0.165	0.078	1.3217e-05	5
Vwc2	6.97945e-10	0.218527	0.239	0.131	1.32191e-05	5
Trip6	1.20273e-09	0.17474	0.254	0.132	2.27797e-05	5
Nr1h2	1.91742e-09	0.165374	0.257	0.13	3.6316e-05	5
Ift27	2.26362e-09	0.157806	0.204	0.098	4.2873e-05	5
Cul1	3.31751e-09	0.167255	0.204	0.102	6.28337e-05	5
Ctdsp2	4.5754e-09	0.167628	0.357	0.197	8.66581e-05	5
Svbp	4.61718e-09	0.177125	0.336	0.188	8.74494e-05	5
Tmem38b	4.75827e-09	0.202196	0.31	0.18	9.01216e-05	5
Sec11c	5.57254e-09	0.191456	0.496	0.3	0.000105544	5
Hadh	1.00376e-08	0.166696	0.277	0.153	0.000190112	5
Nsa2	1.10659e-08	0.213984	0.44	0.271	0.000209588	5
Luzp1	1.19386e-08	0.179499	0.316	0.183	0.000226117	5
Gamt	1.24619e-08	0.171075	0.301	0.168	0.000236028	5
Ttc28	1.50455e-08	0.220842	0.463	0.306	0.000284961	5
Acadvl	1.74976e-08	0.168844	0.36	0.202	0.000331405	5
Tmem30a	1.97929e-08	0.194328	0.322	0.191	0.000374877	5
Rasgrp2	2.7781e-08	0.195512	0.363	0.218	0.000526173	5
Gm2a	3.25816e-08	0.164928	0.248	0.136	0.000617096	5
Llph	4.90721e-08	0.147865	0.215	0.115	0.000929425	5
Dynll2	4.95875e-08	0.150976	0.304	0.171	0.000939188	5
Dcun1d5	5.13439e-08	0.166746	0.274	0.157	0.000972454	5
Emc6	6.83181e-08	0.157778	0.375	0.218	0.00129395	5
Bccip	7.42136e-08	0.169286	0.286	0.168	0.0014056	5
Xpr1	7.48713e-08	0.205538	0.301	0.18	0.00141806	5
Gsk3b	7.85312e-08	0.158333	0.227	0.123	0.00148738	5
Wnk1	8.51936e-08	0.187216	0.333	0.199	0.00161357	5
Hnrnpm	9.01085e-08	0.155102	0.265	0.15	0.00170666	5
Bmpr1a	9.15219e-08	0.16642	0.345	0.209	0.00173343	5
Smc6	1.01852e-07	0.160984	0.345	0.211	0.00192908	5
Mfsd10	1.19411e-07	0.139792	0.192	0.101	0.00226164	5
Sri	1.21829e-07	0.186713	0.301	0.18	0.00230744	5
Supt4a	1.24855e-07	0.16521	0.277	0.163	0.00236476	5
Cystm1	1.48002e-07	0.177221	0.26	0.151	0.00280315	5
Chchd7	1.6453e-07	0.153851	0.233	0.13	0.0031162	5
Ube2k	1.75719e-07	0.171597	0.398	0.246	0.00332813	5
Ube2i	1.89607e-07	0.165148	0.357	0.215	0.00359116	5
Eri3	1.92362e-07	0.15554	0.357	0.21	0.00364333	5
Txnip	2.07537e-07	0.124517	0.304	0.171	0.00393074	5
Ppp1cc	2.0883e-07	0.166024	0.292	0.179	0.00395524	5
Pdha1	2.12493e-07	0.159732	0.307	0.181	0.00402461	5
Zmat2	2.2275e-07	0.158687	0.348	0.207	0.00421889	5
Arf6	2.35592e-07	0.171995	0.242	0.146	0.00446211	5
Cwc25	2.73922e-07	0.18738	0.106	0.048	0.00518808	5
Avpi1	3.01687e-07	0.143844	0.292	0.166	0.00571395	5
Hspa9	4.24833e-07	0.152859	0.33	0.195	0.00804634	5
1110065P20Rik	4.51085e-07	0.1564	0.425	0.256	0.00854355	5
Kcnab1	4.79229e-07	0.164399	0.369	0.226	0.0090766	5
Ptges3	5.00156e-07	0.174638	0.357	0.226	0.00947296	5
Chp1	6.17107e-07	0.157459	0.324	0.199	0.011688	5
BC004004	6.40784e-07	0.161966	0.295	0.181	0.0121365	5
Hif1a	6.54553e-07	0.154646	0.206	0.119	0.0123972	5
Stbd1	7.22694e-07	0.182736	0.363	0.232	0.0136878	5
Trim28	7.38603e-07	0.138104	0.221	0.124	0.0139891	5
Snrnp70	7.48981e-07	0.123669	0.195	0.104	0.0141857	5
Supt5	8.45355e-07	0.183507	0.227	0.137	0.016011	5
Pak2	8.9342e-07	0.14629	0.224	0.131	0.0169214	5
Hebp1	9.27877e-07	0.171914	0.369	0.228	0.017574	5
Eci2	9.60241e-07	0.155237	0.248	0.154	0.018187	5
Magoh	9.60909e-07	0.172032	0.28	0.174	0.0181996	5
Tmem261	9.68209e-07	0.137292	0.295	0.172	0.0183379	5
Pnisr	9.79629e-07	0.130744	0.26	0.15	0.0185542	5
Ugdh	1.03154e-06	0.183491	0.145	0.077	0.0195373	5
Ddt	1.0747e-06	0.141532	0.274	0.162	0.0203549	5
Gltscr2	1.35804e-06	0.20686	0.587	0.48	0.0257213	5
Mrpl57	1.43382e-06	0.135915	0.351	0.213	0.0271565	5
Pnp	1.50679e-06	0.139459	0.15	0.082	0.0285385	5
Lhfp	1.52232e-06	0.138436	0.912	0.828	0.0288328	5
Tes	1.54929e-06	0.157998	0.336	0.209	0.0293435	5
Ski	1.74512e-06	0.137595	0.274	0.161	0.0330526	5
Sfr1	1.93577e-06	0.202579	0.605	0.45	0.0366635	5
Kxd1	2.02365e-06	0.127335	0.239	0.14	0.0383279	5
Grcc10	2.05412e-06	0.153471	0.289	0.178	0.0389051	5
Tmbim4	2.18185e-06	0.129288	0.251	0.149	0.0413243	5
Rtf1	2.32914e-06	0.15885	0.381	0.256	0.0441139	5
Adk	2.54809e-13	0.230295	0.301	0.147	4.82609e-09	5
Ap1ar	6.20852e-35	0.107542	0.159	0.03	1.17589e-30	5
Azin1	1.69645e-18	0.276543	0.248	0.106	3.21309e-14	5
Calm3	2.83742e-08	0.222536	0.563	0.408	0.000537408	5
Ddx3y	8.29304e-12	0.217929	0.251	0.126	1.5707e-07	5
Dusp5	3.25224e-73	0.206697	0.251	0.037	6.15975e-69	5
Efs	2.21195e-32	0.133388	0.192	0.044	4.18943e-28	5
Fam118b	1.03759e-45	0.101178	0.15	0.021	1.9652e-41	5
Gm10036	1.02411e-13	0.249333	0.283	0.138	1.93967e-09	5
Gpc6	3.38419e-09	0.200668	0.292	0.173	6.40966e-05	5
Hrsp12	1.46665e-34	0.119466	0.198	0.043	2.77783e-30	5
Kcnma1	2.65628e-41	0.152276	0.209	0.042	5.031e-37	5
Mcts2	9.28202e-29	0.109102	0.156	0.034	1.75801e-24	5
Mgst1	1.13885e-28	0.296909	0.251	0.081	2.15698e-24	5
Ncor1	4.90506e-11	0.214798	0.501	0.29	9.29019e-07	5
Nfkbiz	5.19732e-16	0.278214	0.245	0.11	9.84372e-12	5
Phlda1	9.35539e-09	0.250689	0.201	0.106	0.000177191	5
Pim3	9.8632e-27	0.350673	0.292	0.107	1.86809e-22	5
Rbm25	8.61653e-12	0.23114	0.419	0.238	1.63197e-07	5
Rps18-ps3	7.62419e-17	0.286595	0.366	0.195	1.44402e-12	5
Rras2	1.92864e-29	0.107058	0.174	0.039	3.65285e-25	5
Sat2	2.1868e-50	0.141606	0.201	0.033	4.1418e-46	5
Sdpr	1.44213e-08	0.16837	0.189	0.096	0.00027314	5
Slc44a2	3.48689e-08	0.172047	0.286	0.16	0.000660417	5
Snrpf	4.84696e-12	0.226906	0.454	0.25	9.18015e-08	5
Spag9	1.4382e-10	0.21023	0.227	0.116	2.72394e-06	5
Tmem123	6.20211e-11	0.184262	0.292	0.149	1.17468e-06	5
Frzb	0	1.33547	0.634	0.045	0	6
Prrx2	0	1.24883	0.659	0.053	0	6
Prss12	0	1.17839	0.538	0.017	0	6
Fbln1	0	0.86745	0.373	0.011	0	6
Adamtsl1	0	0.700472	0.443	0.004	0	6
Lrrtm3	0	0.572282	0.331	0.002	0	6
Tshz2	0	0.550767	0.389	0.012	0	6
Dlx6	0	0.511854	0.363	0.005	0	6
Dlx5	0	0.482306	0.363	0.01	0	6
Msx2	0	0.436194	0.366	0.004	0	6
Tfap2b	4.30473e-296	0.396273	0.277	0.006	8.15316e-292	6
Dlx6os1	4.61124e-253	0.309044	0.232	0.005	8.73369e-249	6
Ttll5	5.08873e-226	0.52963	0.369	0.024	9.63806e-222	6
Gdf10	1.40431e-197	0.781395	0.376	0.03	2.65977e-193	6
Pianp	1.03024e-188	0.308129	0.236	0.009	1.95127e-184	6
Gxylt2	3.72656e-182	1.30893	0.697	0.154	7.0581e-178	6
Lnx1	1.251e-170	0.448537	0.283	0.018	2.36939e-166	6
Gng2	2.11112e-167	0.367479	0.255	0.014	3.99845e-163	6
Mdk	1.78564e-155	0.589602	0.331	0.031	3.382e-151	6
Gpc3	3.68479e-150	0.503504	0.229	0.013	6.97899e-146	6
Lamc3	1.58419e-145	0.723464	0.373	0.043	3.00045e-141	6
Pthlh	1.53958e-141	0.298075	0.22	0.013	2.91597e-137	6
Mfap5	4.29143e-133	1.19403	0.924	0.673	8.12798e-129	6
Lrrc17	5.35405e-125	1.15848	0.726	0.26	1.01406e-120	6
Phactr1	9.73932e-124	0.906157	0.5	0.1	1.84463e-119	6
Sod3	2.02626e-119	0.670998	0.984	0.973	3.83774e-115	6
Fgf5	2.18209e-118	0.132136	0.108	0.002	4.13287e-114	6
Itm2b	4.62226e-116	0.4697	0.997	0.974	8.75457e-112	6
Thbd	5.38831e-113	0.634647	0.344	0.048	1.02055e-108	6
Cntfr	1.80712e-108	0.252247	0.188	0.013	3.42269e-104	6
Negr1	4.33456e-102	0.13741	0.102	0.003	8.20966e-98	6
Nkain4	6.11007e-100	0.159707	0.115	0.004	1.15725e-95	6
Il33	7.19213e-98	0.240945	0.127	0.005	1.36219e-93	6
Fez1	6.16276e-95	0.852762	0.49	0.125	1.16723e-90	6
Psap	1.52528e-94	0.455405	0.984	0.947	2.88888e-90	6
Ppp1r1b	3.66099e-91	0.578485	0.306	0.047	6.93392e-87	6
Dlx2	4.67023e-91	0.127119	0.111	0.004	8.84541e-87	6
Egln3	2.92162e-90	0.384509	0.299	0.045	5.53355e-86	6
3632451O06Rik	3.46634e-90	0.222825	0.166	0.012	6.56524e-86	6
Rcn1	4.31381e-88	0.835468	0.494	0.134	8.17037e-84	6
Coch	5.53879e-88	0.295952	0.137	0.008	1.04905e-83	6
Ackr3	8.1569e-86	0.288937	0.137	0.008	1.54492e-81	6
Gm1673	1.78048e-85	0.238942	0.201	0.02	3.37223e-81	6
Foxf1	6.8743e-85	0.243851	0.207	0.021	1.30199e-80	6
Nudt4	5.62855e-82	0.787027	0.85	0.603	1.06605e-77	6
F3	4.46092e-81	0.443754	0.21	0.023	8.44899e-77	6
Vstm4	5.36818e-81	0.451625	0.236	0.03	1.01673e-76	6
Ltbp2	6.08298e-79	0.591672	0.309	0.055	1.15212e-74	6
Lama2	2.14645e-77	0.329843	0.194	0.021	4.06537e-73	6
Osr1	2.38202e-77	1.11972	0.732	0.421	4.51155e-73	6
Nt5dc2	4.19635e-77	0.286223	0.204	0.023	7.94789e-73	6
Stk32a	1.08773e-76	0.11144	0.102	0.005	2.06015e-72	6
Shc2	1.37241e-75	0.205162	0.185	0.019	2.59934e-71	6
Sfrp2	4.59997e-74	1.70757	0.589	0.238	8.71235e-70	6
Dab2	5.14637e-72	0.147782	0.121	0.008	9.74723e-68	6
Ednra	1.8673e-71	0.174788	0.14	0.011	3.53668e-67	6
Spock2	3.90952e-71	0.164038	0.134	0.01	7.40464e-67	6
Adgrd1	2.06171e-69	0.143789	0.121	0.008	3.90487e-65	6
Mia	7.92772e-68	0.752787	0.344	0.078	1.50151e-63	6
Lpar1	8.00919e-68	0.170891	0.121	0.008	1.51694e-63	6
Enpp5	4.61875e-67	0.579802	0.312	0.066	8.74791e-63	6
Tsc22d1	1.1664e-66	0.719497	0.866	0.645	2.20916e-62	6
Oat	2.16232e-66	0.566192	0.86	0.71	4.09544e-62	6
Bgn	1.02567e-64	0.256717	1	1	1.94262e-60	6
Nlrp10	7.85415e-64	0.112558	0.105	0.007	1.48758e-59	6
Asrgl1	8.8751e-64	0.360469	0.271	0.048	1.68094e-59	6
Galnt6	1.03305e-62	0.271903	0.204	0.029	1.9566e-58	6
Efemp1	1.95745e-62	0.154276	0.115	0.008	3.7074e-58	6
Snai1	5.80801e-61	0.177599	0.108	0.007	1.10004e-56	6
Tmem86a	5.48477e-58	0.385223	0.204	0.031	1.03882e-53	6
H2-DMb1	2.33753e-57	0.296047	0.188	0.026	4.42728e-53	6
Tspan7	4.04118e-56	0.650791	0.398	0.124	7.65399e-52	6
Uaca	9.39106e-56	0.558405	0.331	0.085	1.77867e-51	6
Abi3bp	9.68033e-56	0.79369	0.462	0.167	1.83345e-51	6
Nrep	1.17643e-54	0.262225	0.191	0.028	2.22817e-50	6
Man2a1	2.49e-54	0.167799	0.127	0.012	4.71606e-50	6
Wnt5b	8.25463e-53	0.189223	0.143	0.017	1.56343e-48	6
Pde4d	1.47473e-52	0.287082	0.197	0.033	2.79314e-48	6
Tap2	2.28502e-50	0.14869	0.137	0.015	4.32783e-46	6
Phf11d	5.99183e-50	0.183118	0.134	0.015	1.13485e-45	6
Lyrm9	1.19445e-49	0.135288	0.115	0.011	2.26229e-45	6
F2r	1.07913e-47	0.437257	0.255	0.058	2.04388e-43	6
Sema3c	1.36635e-47	0.610304	0.424	0.151	2.58786e-43	6
Mr1	6.05248e-47	0.214891	0.182	0.029	1.14634e-42	6
Lrrk1	6.04425e-46	0.164239	0.102	0.009	1.14478e-41	6
Malat1	7.16499e-46	0.413508	0.997	0.994	1.35705e-41	6
Golph3l	5.54274e-45	0.146717	0.118	0.013	1.04979e-40	6
Kcnj8	2.86946e-44	0.611009	0.318	0.095	5.43476e-40	6
Kif1a	3.46683e-44	0.261748	0.169	0.027	6.56619e-40	6
Galnt18	9.05501e-44	0.116371	0.108	0.011	1.71502e-39	6
Mfap2	4.13264e-43	0.419466	0.236	0.055	7.82723e-39	6
Sfrp4	6.61777e-42	0.431112	0.153	0.024	1.25341e-37	6
Msx1	1.86055e-41	0.277254	0.166	0.028	3.52388e-37	6
Pdia3	2.02105e-41	0.454581	0.825	0.726	3.82787e-37	6
Serpinh1	2.0809e-41	0.310376	0.962	0.946	3.94122e-37	6
Ubb	5.98549e-41	0.183054	0.997	0.999	1.13365e-36	6
Gria3	1.5355e-40	0.116253	0.115	0.014	2.90823e-36	6
Chst11	5.52511e-40	0.17159	0.146	0.023	1.04646e-35	6
Tmem132a	8.96981e-40	0.488831	0.293	0.087	1.69888e-35	6
Calr	2.8146e-39	0.336902	0.901	0.867	5.33084e-35	6
Cxcl16	7.43941e-39	0.153447	0.137	0.021	1.40902e-34	6
Calcrl	3.00547e-38	0.153171	0.153	0.025	5.69236e-34	6
Sphk1	8.09318e-38	0.179422	0.146	0.023	1.53285e-33	6
Pmp22	2.19631e-37	0.615333	0.592	0.356	4.15981e-33	6
Rgs10	3.99375e-37	0.335084	0.188	0.04	7.56417e-33	6
Slc37a3	4.9461e-37	0.139211	0.115	0.015	9.36792e-33	6
Pde10a	6.07935e-37	0.231898	0.166	0.032	1.15143e-32	6
App	9.62733e-37	0.666259	0.669	0.485	1.82342e-32	6
Sh3kbp1	2.58286e-36	0.17072	0.162	0.031	4.89194e-32	6
Plpp7	4.48155e-36	0.137498	0.118	0.016	8.48806e-32	6
Cbr3	1.26856e-35	0.180939	0.156	0.028	2.40264e-31	6
Gorab	3.02941e-35	0.181069	0.153	0.028	5.73771e-31	6
Ldha	3.32923e-35	0.440082	0.736	0.632	6.30556e-31	6
Tspan3	7.92695e-35	0.51805	0.653	0.465	1.50136e-30	6
Cacna2d3	1.00259e-34	0.210427	0.188	0.042	1.89891e-30	6
Itm2c	1.08993e-34	0.497312	0.694	0.519	2.06434e-30	6
Dcakd	1.09691e-34	0.199749	0.166	0.032	2.07754e-30	6
Reck	1.23505e-34	0.196228	0.137	0.022	2.33919e-30	6
Bmpr1b	2.11291e-34	0.167423	0.15	0.027	4.00185e-30	6
Boc	3.31089e-34	0.195291	0.127	0.02	6.27082e-30	6
Cox6b2	4.94159e-34	0.176335	0.118	0.017	9.35936e-30	6
Elmo2	7.00492e-34	0.146405	0.121	0.018	1.32673e-29	6
Isoc2a	7.86906e-34	0.149254	0.127	0.02	1.4904e-29	6
Gm13305	8.03007e-34	0.272324	0.153	0.029	1.5209e-29	6
Rhoc	1.35266e-33	0.319199	0.876	0.848	2.56194e-29	6
Cd200	2.90027e-33	0.439598	0.815	0.714	5.49312e-29	6
1700040L02Rik	3.16406e-33	0.145553	0.124	0.02	5.99273e-29	6
Slc25a10	8.10827e-33	0.130744	0.105	0.014	1.53571e-28	6
Fam69b	9.1163e-33	0.253217	0.175	0.039	1.72663e-28	6
Gpr4	1.90772e-32	0.136554	0.105	0.015	3.61323e-28	6
Mafb	6.1731e-32	0.23187	0.15	0.029	1.16918e-27	6
Mmgt2	2.35395e-31	0.216643	0.185	0.043	4.45838e-27	6
Sept4	4.92139e-31	0.172427	0.102	0.014	9.32112e-27	6
Mmp2	8.42012e-31	0.377222	0.162	0.035	1.59477e-26	6
Fam213a	1.30278e-30	0.124865	0.105	0.015	2.46746e-26	6
Chst2	2.04148e-30	0.164398	0.14	0.027	3.86656e-26	6
Angptl2	1.27419e-29	0.456858	0.331	0.13	2.41331e-25	6
Acat2	2.74617e-29	0.190462	0.153	0.032	5.20124e-25	6
Unc5b	2.75616e-29	0.144686	0.124	0.022	5.22017e-25	6
Prdm6	3.6141e-29	0.462574	0.325	0.129	6.84511e-25	6
AW209491	3.0533e-28	0.16024	0.15	0.032	5.78295e-24	6
Sft2d1	3.06431e-28	0.150346	0.118	0.02	5.8038e-24	6
Hsp90b1	4.02034e-28	0.410411	0.732	0.657	7.61452e-24	6
Pgr	7.51029e-28	0.134453	0.108	0.018	1.42245e-23	6
D030056L22Rik	3.99055e-27	0.149942	0.143	0.03	7.55811e-23	6
Pds5b	5.17146e-27	0.131363	0.111	0.019	9.79475e-23	6
Gba	9.1135e-27	0.116087	0.105	0.017	1.7261e-22	6
Mto1	1.61788e-26	0.107146	0.108	0.018	3.06426e-22	6
Ezh1	1.62824e-26	0.148789	0.121	0.023	3.08389e-22	6
Cdc25b	1.96192e-26	0.113625	0.102	0.017	3.71587e-22	6
Pdzrn3	2.34011e-26	0.194314	0.188	0.049	4.43217e-22	6
Ddit4	2.90121e-26	0.490233	0.22	0.069	5.49488e-22	6
Gm10053	3.44576e-26	0.137166	0.131	0.026	6.52627e-22	6
Cpsf6	4.54565e-26	0.179856	0.188	0.049	8.60946e-22	6
Loxl2	5.71317e-26	0.225733	0.201	0.059	1.08207e-21	6
Slc35f6	5.72041e-26	0.139623	0.115	0.021	1.08345e-21	6
Trps1	7.49731e-26	0.131722	0.108	0.019	1.41999e-21	6
Asb8	7.77053e-26	0.162741	0.156	0.036	1.47174e-21	6
Ubald1	9.97313e-26	0.16147	0.111	0.02	1.88891e-21	6
Gpnmb	1.63654e-25	0.11566	0.108	0.019	3.09961e-21	6
Zfp277	2.06348e-25	0.143005	0.131	0.027	3.90823e-21	6
Slc2a10	2.0952e-25	0.129323	0.111	0.02	3.96831e-21	6
Commd10	3.27814e-25	0.185588	0.185	0.049	6.20879e-21	6
Npc1	4.89603e-25	0.160373	0.134	0.029	9.27308e-21	6
Ctbs	6.90724e-25	0.120958	0.115	0.022	1.30823e-20	6
Ttc32	8.98342e-25	0.124946	0.121	0.024	1.70146e-20	6
Epha3	3.15591e-24	0.140525	0.124	0.025	5.9773e-20	6
Shfm1	4.86549e-24	0.236314	0.844	0.837	9.21525e-20	6
Dse	7.11267e-24	0.144679	0.127	0.027	1.34714e-19	6
Piezo1	8.254e-24	0.160748	0.162	0.043	1.56331e-19	6
Gm10600	1.17023e-23	0.166585	0.121	0.026	2.21642e-19	6
Mccc2	1.59196e-23	0.136092	0.121	0.025	3.01518e-19	6
Eepd1	1.91848e-23	0.146456	0.111	0.022	3.6336e-19	6
Ankrd44	2.90272e-23	0.151896	0.127	0.028	5.49775e-19	6
Cilp2	5.28236e-23	0.146766	0.108	0.021	1.00048e-18	6
Pde5a	6.63045e-23	0.447968	0.309	0.139	1.25581e-18	6
Atpaf1	7.37154e-23	0.140741	0.121	0.026	1.39617e-18	6
Kctd1	1.01165e-22	0.133094	0.118	0.025	1.91607e-18	6
Cerk	1.11174e-22	0.143821	0.121	0.026	2.10563e-18	6
Gas1	1.3355e-22	0.328823	0.201	0.064	2.52944e-18	6
Tmem68	1.64885e-22	0.119851	0.108	0.021	3.12293e-18	6
Pid1	2.1195e-22	0.274532	0.162	0.045	4.01433e-18	6
Metrnl	2.64719e-22	0.315295	0.207	0.07	5.01379e-18	6
Dnaja3	3.20343e-22	0.154357	0.121	0.026	6.06729e-18	6
5730409E04Rik	3.68755e-22	0.154949	0.121	0.026	6.98421e-18	6
Cmtm6	5.13015e-22	0.167931	0.131	0.03	9.71651e-18	6
Ces2g	5.22728e-22	0.157922	0.115	0.024	9.90046e-18	6
Pick1	8.38382e-22	0.140821	0.118	0.025	1.5879e-17	6
Map1lc3a	1.07654e-21	0.199591	0.943	0.928	2.03897e-17	6
Kcnk3	2.58213e-21	0.156474	0.143	0.037	4.89055e-17	6
Pdzrn4	2.61019e-21	0.311314	0.146	0.039	4.94371e-17	6
Kctd15	3.17364e-21	0.116338	0.115	0.025	6.01087e-17	6
Tmem26	3.99281e-21	0.123731	0.124	0.03	7.56239e-17	6
Poldip3	4.53654e-21	0.160457	0.137	0.034	8.59222e-17	6
Mpped2	5.4528e-21	0.185618	0.127	0.031	1.03276e-16	6
Hspa5	7.20793e-21	0.345659	0.745	0.689	1.36518e-16	6
Kcnc4	7.5392e-21	0.258223	0.191	0.061	1.42792e-16	6
Cox4i2	1.81715e-20	0.510463	0.21	0.076	3.44168e-16	6
Gaa	2.37989e-20	0.402821	0.283	0.126	4.50752e-16	6
Mapk9	2.65757e-20	0.137861	0.131	0.032	5.03344e-16	6
Pir	2.9146e-20	0.126234	0.127	0.032	5.52026e-16	6
Lbr	3.39289e-20	0.126569	0.118	0.027	6.42614e-16	6
Casd1	4.31722e-20	0.120137	0.105	0.022	8.17681e-16	6
Lgmn	4.39114e-20	0.449503	0.385	0.212	8.31682e-16	6
Ado	6.44394e-20	0.155059	0.131	0.032	1.22048e-15	6
Mrpl9	9.84625e-20	0.169661	0.159	0.046	1.86488e-15	6
Atp1b3	1.00308e-19	0.434231	0.462	0.296	1.89983e-15	6
Ndrg4	1.04504e-19	0.175599	0.118	0.028	1.9793e-15	6
Hiatl1	1.57092e-19	0.113622	0.105	0.023	2.97531e-15	6
H2afy2	1.77519e-19	0.138796	0.121	0.029	3.36222e-15	6
Pdk2	1.94762e-19	0.148815	0.124	0.03	3.68878e-15	6
Chadl	2.8555e-19	0.117612	0.102	0.022	5.40832e-15	6
Mllt4	3.56647e-19	0.156205	0.102	0.022	6.75489e-15	6
Ogfr	5.50617e-19	0.157396	0.146	0.041	1.04287e-14	6
2600006K01Rik	6.17595e-19	0.109782	0.102	0.022	1.16972e-14	6
Etl4	7.02695e-19	0.144622	0.124	0.032	1.3309e-14	6
Rab2b	7.91946e-19	0.143849	0.14	0.038	1.49995e-14	6
Crispld1	9.28312e-19	0.191832	0.134	0.037	1.75822e-14	6
Mblac2	1.08496e-18	0.124449	0.105	0.024	2.05492e-14	6
Mzt2	1.13418e-18	0.207704	0.191	0.064	2.14814e-14	6
Pou3f1	1.32948e-18	0.138338	0.111	0.026	2.51803e-14	6
Tapbpl	1.98842e-18	0.104821	0.108	0.025	3.76606e-14	6
Lrig3	2.05694e-18	0.113389	0.131	0.035	3.89585e-14	6
Cyb5a	3.22597e-18	0.305418	0.672	0.563	6.10999e-14	6
Ogg1	4.11467e-18	0.10065	0.105	0.024	7.79318e-14	6
Tigd2	5.73489e-18	0.147092	0.143	0.04	1.08619e-13	6
Gm26632	1.115e-17	0.170689	0.131	0.036	2.11181e-13	6
Sumf2	1.3381e-17	0.138575	0.102	0.023	2.53436e-13	6
Tmed10	1.35185e-17	0.305176	0.682	0.564	2.5604e-13	6
Fbxl13	1.81432e-17	0.110744	0.105	0.025	3.43632e-13	6
Ypel3	2.1123e-17	0.423564	0.529	0.4	4.0007e-13	6
Ascc3	2.20854e-17	0.104047	0.115	0.029	4.18297e-13	6
P3h3	2.54764e-17	0.465	0.366	0.205	4.82522e-13	6
Slc25a29	2.57664e-17	0.130676	0.115	0.029	4.88016e-13	6
Laptm4a	4.45636e-17	0.197454	0.863	0.893	8.44035e-13	6
Ctf1	6.71075e-17	0.111563	0.108	0.027	1.27102e-12	6
Bche	6.84047e-17	0.121827	0.118	0.031	1.29559e-12	6
Klhdc1	6.99976e-17	0.110416	0.102	0.024	1.32575e-12	6
Lysmd2	1.00441e-16	0.296536	0.21	0.085	1.90235e-12	6
Deaf1	1.18824e-16	0.141666	0.102	0.025	2.25053e-12	6
Ptk2	1.22453e-16	0.105314	0.115	0.03	2.31926e-12	6
Homer3	1.95572e-16	0.11477	0.102	0.024	3.70412e-12	6
Ggct	2.12519e-16	0.131583	0.124	0.035	4.02512e-12	6
Klhl8	2.91796e-16	0.136145	0.115	0.031	5.52661e-12	6
Minpp1	3.42509e-16	0.151402	0.121	0.034	6.48713e-12	6
Cpox	3.99806e-16	0.120049	0.108	0.027	7.57233e-12	6
Tmx1	4.12099e-16	0.344859	0.296	0.146	7.80516e-12	6
Scarf2	4.19207e-16	0.375995	0.264	0.127	7.93978e-12	6
Mdh1	4.42516e-16	0.305649	0.656	0.58	8.38125e-12	6
Tapbp	5.14394e-16	0.395124	0.287	0.144	9.74263e-12	6
Snx14	5.70115e-16	0.132904	0.118	0.032	1.0798e-11	6
Mpzl1	6.18262e-16	0.255237	0.127	0.038	1.17099e-11	6
Pdia5	6.41741e-16	0.151869	0.108	0.028	1.21546e-11	6
Gnb2	6.68497e-16	0.266912	0.739	0.687	1.26613e-11	6
Plxdc2	8.57108e-16	0.402415	0.331	0.18	1.62336e-11	6
Six5	8.73739e-16	0.120129	0.115	0.03	1.65486e-11	6
Fndc4	9.83409e-16	0.114148	0.118	0.033	1.86258e-11	6
Chst14	9.95296e-16	0.122078	0.137	0.042	1.88509e-11	6
Ptbp2	1.02068e-15	0.115777	0.102	0.025	1.93316e-11	6
Cpped1	1.36663e-15	0.175358	0.121	0.035	2.58841e-11	6
Rufy1	1.56086e-15	0.121584	0.108	0.028	2.95627e-11	6
Qpct	2.36125e-15	0.297319	0.178	0.068	4.4722e-11	6
Fabp3	2.95443e-15	0.384666	0.287	0.146	5.59568e-11	6
Galnt11	3.88011e-15	0.216666	0.162	0.057	7.34892e-11	6
Sema3d	5.05224e-15	0.238631	0.156	0.055	9.56894e-11	6
Zcchc18	5.89324e-15	0.130172	0.102	0.027	1.11618e-10	6
Dkc1	6.63919e-15	0.124767	0.108	0.029	1.25746e-10	6
Tmem216	8.73171e-15	0.10424	0.102	0.026	1.65379e-10	6
Zfp664	1.02894e-14	0.13003	0.146	0.048	1.94882e-10	6
Sox9	1.23664e-14	0.237045	0.137	0.044	2.34219e-10	6
Stk38	2.05805e-14	0.134942	0.115	0.033	3.89795e-10	6
Rbm43	2.18846e-14	0.131124	0.15	0.053	4.14495e-10	6
Tm9sf4	2.32756e-14	0.13698	0.108	0.03	4.4084e-10	6
Fstl1	2.54793e-14	0.275634	0.732	0.71	4.82579e-10	6
Tmem2	2.81648e-14	0.106922	0.118	0.035	5.33442e-10	6
Trpt1	4.45783e-14	0.127401	0.159	0.057	8.44313e-10	6
Anapc16	5.62133e-14	0.322433	0.255	0.125	1.06468e-09	6
Lipa	5.69964e-14	0.114936	0.111	0.032	1.07951e-09	6
H6pd	5.8705e-14	0.100347	0.111	0.032	1.11187e-09	6
Sptssa	6.27691e-14	0.361618	0.484	0.327	1.18885e-09	6
Gmcl1	6.80929e-14	0.106469	0.102	0.028	1.28968e-09	6
Larp6	7.36935e-14	0.132463	0.14	0.049	1.39575e-09	6
Kat7	1.04892e-13	0.104463	0.108	0.031	1.98666e-09	6
Tmem109	1.09507e-13	0.399579	0.481	0.369	2.07406e-09	6
Dtd1	1.22575e-13	0.27834	0.162	0.063	2.32156e-09	6
Dchs1	1.79502e-13	0.104691	0.105	0.031	3.39978e-09	6
Dbi	2.45244e-13	0.180332	0.809	0.837	4.64492e-09	6
Slc22a2	3.86442e-13	0.235516	0.137	0.047	7.31921e-09	6
Setd6	5.57696e-13	0.310032	0.223	0.108	1.05628e-08	6
H3f3a	6.27248e-13	0.133229	0.908	0.951	1.18801e-08	6
Sox4	6.47835e-13	0.360025	0.204	0.091	1.227e-08	6
Ctsf	8.45524e-13	0.381471	0.293	0.164	1.60142e-08	6
Gm26699	9.42239e-13	0.120129	0.111	0.035	1.7846e-08	6
Tfb2m	1.10766e-12	0.144676	0.159	0.062	2.0979e-08	6
Matn2	1.14464e-12	0.10615	0.102	0.03	2.16795e-08	6
Enpp1	1.42729e-12	0.172695	0.108	0.034	2.70329e-08	6
Atf1	1.48443e-12	0.164583	0.143	0.052	2.81151e-08	6
Nxt2	1.73736e-12	0.122923	0.108	0.033	3.29056e-08	6
Dync2h1	1.90459e-12	0.102152	0.108	0.034	3.6073e-08	6
Reep5	2.0233e-12	0.170576	0.78	0.823	3.83213e-08	6
Cyp2d22	2.08342e-12	0.109438	0.124	0.042	3.94599e-08	6
Irak1bp1	2.19292e-12	0.140455	0.131	0.044	4.15339e-08	6
Exoc5	2.32442e-12	0.127794	0.124	0.041	4.40245e-08	6
Nrp1	2.51369e-12	0.298165	0.169	0.071	4.76092e-08	6
Cldn3	2.64789e-12	0.229623	0.121	0.041	5.01511e-08	6
Phc3	2.65672e-12	0.115913	0.108	0.033	5.03182e-08	6
Cnpy2	2.6615e-12	0.343279	0.487	0.375	5.04088e-08	6
Trib2	3.52394e-12	0.100029	0.102	0.031	6.67434e-08	6
Antxr2	3.60907e-12	0.10184	0.102	0.03	6.83559e-08	6
Nipsnap1	3.72892e-12	0.12671	0.115	0.038	7.06257e-08	6
Nsg1	4.38757e-12	0.108887	0.108	0.035	8.31005e-08	6
Gm10263	4.78236e-12	0.102746	0.134	0.047	9.0578e-08	6
Xpnpep1	4.79828e-12	0.233892	0.15	0.06	9.08794e-08	6
Tubb4a	7.50747e-12	0.161207	0.159	0.063	1.42192e-07	6
Atp6v0e	1.05861e-11	0.209839	0.704	0.701	2.00501e-07	6
Ahcyl2	1.22432e-11	0.143775	0.105	0.034	2.31886e-07	6
Nufip2	1.23414e-11	0.126107	0.105	0.033	2.33747e-07	6
Prpf6	1.36593e-11	0.155251	0.127	0.046	2.58708e-07	6
Pla2g15	1.60421e-11	0.150572	0.105	0.034	3.03837e-07	6
H2-K1	1.71245e-11	0.406022	0.357	0.238	3.24338e-07	6
Tcn2	1.77746e-11	0.256209	0.178	0.08	3.3665e-07	6
Atp6ap2	1.9164e-11	0.309616	0.258	0.142	3.62965e-07	6
Cdc23	2.12258e-11	0.106466	0.111	0.036	4.02016e-07	6
Zcchc10	2.20623e-11	0.134413	0.108	0.035	4.1786e-07	6
Ripk1	2.36002e-11	0.107368	0.102	0.032	4.46988e-07	6
Seh1l	3.00168e-11	0.131115	0.121	0.042	5.68518e-07	6
Phgdh	3.20044e-11	0.144998	0.121	0.043	6.06163e-07	6
Lrpap1	4.22174e-11	0.357866	0.487	0.421	7.99598e-07	6
Urgcp	4.42513e-11	0.124581	0.121	0.042	8.38121e-07	6
Ninj1	4.59629e-11	0.363046	0.452	0.359	8.70538e-07	6
Fcgrt	5.49619e-11	0.316996	0.465	0.367	1.04098e-06	6
Bpgm	5.63823e-11	0.258998	0.14	0.056	1.06788e-06	6
Dhdds	6.11986e-11	0.1443	0.121	0.044	1.1591e-06	6
Atp6v0a1	6.21748e-11	0.218194	0.134	0.053	1.17759e-06	6
Vps53	7.76684e-11	0.113282	0.14	0.053	1.47104e-06	6
Rnf20	7.77131e-11	0.117575	0.102	0.033	1.47189e-06	6
Zmiz2	8.84553e-11	0.10784	0.111	0.038	1.67534e-06	6
Smyd3	1.33639e-10	0.122225	0.124	0.048	2.53113e-06	6
Bik	1.41376e-10	0.347551	0.296	0.183	2.67767e-06	6
Efna5	1.54657e-10	0.28752	0.236	0.13	2.9292e-06	6
Gstt2	1.56192e-10	0.134174	0.14	0.055	2.95827e-06	6
Tnnt1	2.46521e-10	0.14341	0.111	0.04	4.66911e-06	6
Ift46	2.63562e-10	0.279369	0.226	0.12	4.99187e-06	6
Gstm7	2.65244e-10	0.267645	0.185	0.09	5.02372e-06	6
Ginm1	3.42736e-10	0.306533	0.347	0.229	6.49142e-06	6
Kctd10	3.56941e-10	0.292945	0.554	0.479	6.76046e-06	6
Hsp90aa1	4.02989e-10	0.152456	0.793	0.854	7.63261e-06	6
Taok3	5.68187e-10	0.131521	0.134	0.053	1.07615e-05	6
Mmp14	5.85594e-10	0.230167	0.175	0.084	1.10911e-05	6
Aco1	6.65128e-10	0.119236	0.108	0.039	1.25975e-05	6
Erap1	7.12928e-10	0.112504	0.102	0.036	1.35029e-05	6
Ppib	8.85722e-10	0.131987	0.796	0.842	1.67756e-05	6
Fmo2	9.19186e-10	0.312347	0.592	0.518	1.74094e-05	6
Arsb	1.68284e-09	0.100411	0.108	0.04	3.18729e-05	6
Mettl16	1.8076e-09	0.119601	0.115	0.043	3.42359e-05	6
Fbxo33	2.08075e-09	0.103832	0.105	0.037	3.94094e-05	6
Dusp14	2.0958e-09	0.183123	0.111	0.043	3.96945e-05	6
Zkscan3	2.41793e-09	0.120989	0.108	0.04	4.57955e-05	6
Mthfd2	2.78164e-09	0.110966	0.111	0.042	5.26842e-05	6
Idh2	2.79936e-09	0.336716	0.389	0.291	5.30198e-05	6
Steap3	3.06816e-09	0.135779	0.169	0.082	5.8111e-05	6
Dync2li1	3.29198e-09	0.163708	0.127	0.053	6.23501e-05	6
Trmt2b	3.49385e-09	0.113053	0.102	0.036	6.61735e-05	6
Phf14	3.98118e-09	0.131503	0.102	0.037	7.54036e-05	6
Litaf	5.09415e-09	0.155752	0.121	0.049	9.64833e-05	6
Eif4h	6.91598e-09	0.273381	0.459	0.375	0.000130989	6
Smpdl3a	7.94158e-09	0.310674	0.411	0.311	0.000150414	6
Hoxb4	1.10674e-08	0.129697	0.121	0.05	0.000209616	6
Ctdspl	1.37753e-08	0.196094	0.204	0.109	0.000260904	6
Oxld1	1.50957e-08	0.122661	0.121	0.051	0.000285912	6
Igsf8	1.68524e-08	0.314156	0.271	0.176	0.000319184	6
Morf4l1	1.7779e-08	0.126163	0.828	0.889	0.000336735	6
Rarg	1.96593e-08	0.113768	0.115	0.046	0.000372347	6
Pgam5	1.9714e-08	0.112879	0.121	0.051	0.000373384	6
Zbtb11os1	1.998e-08	0.108181	0.131	0.056	0.000378421	6
Fam98a	2.07212e-08	0.103144	0.102	0.039	0.00039246	6
Ddost	3.83303e-08	0.245966	0.538	0.523	0.000725976	6
Atg3	4.27164e-08	0.270103	0.296	0.193	0.000809048	6
Ep400	4.28828e-08	0.11493	0.121	0.051	0.000812201	6
Pebp1	4.43332e-08	0.119306	0.745	0.812	0.000839671	6
Pex13	4.50055e-08	0.101752	0.111	0.045	0.000852404	6
Gabbr1	5.23937e-08	0.187372	0.14	0.066	0.000992338	6
Ssr2	7.71893e-08	0.319772	0.42	0.357	0.00146196	6
Selm	9.31435e-08	0.152934	0.793	0.776	0.00176414	6
Ube2e2	9.83178e-08	0.109216	0.111	0.046	0.00186214	6
Insig2	1.05213e-07	0.270792	0.258	0.169	0.00199274	6
Usp20	1.22339e-07	0.142042	0.105	0.044	0.0023171	6
Gstm5	1.24175e-07	0.279629	0.296	0.205	0.00235187	6
Hdac1	1.5236e-07	0.263167	0.245	0.154	0.0028857	6
Speg	1.66188e-07	0.314423	0.385	0.304	0.0031476	6
Cux1	1.71547e-07	0.257837	0.22	0.13	0.00324909	6
Pts	1.77603e-07	0.133945	0.131	0.061	0.0033638	6
Tmed4	1.99398e-07	0.288469	0.271	0.182	0.0037766	6
Cib2	2.04675e-07	0.114572	0.115	0.049	0.00387655	6
Glmp	2.06191e-07	0.291209	0.28	0.192	0.00390526	6
Adamts2	2.06521e-07	0.279785	0.236	0.148	0.00391151	6
Jam3	2.23123e-07	0.284696	0.293	0.202	0.00422594	6
Zfos1	2.47196e-07	0.256635	0.248	0.152	0.0046819	6
Azin2	3.03021e-07	0.110967	0.137	0.068	0.00573921	6
Bnip3l	3.91929e-07	0.246854	0.268	0.18	0.00742313	6
Kptn	4.04928e-07	0.103651	0.102	0.043	0.00766934	6
Gng5	4.17092e-07	0.100695	0.799	0.856	0.00789972	6
Grn	4.45504e-07	0.249103	0.487	0.434	0.00843785	6
Rab3a	4.68144e-07	0.279373	0.255	0.169	0.00886665	6
Gcn1l1	5.37603e-07	0.11563	0.105	0.046	0.0101822	6
Enpp4	5.45136e-07	0.119012	0.115	0.053	0.0103249	6
Rab34	5.47735e-07	0.271284	0.299	0.207	0.0103741	6
Aplp1	6.31629e-07	0.244051	0.229	0.146	0.0119631	6
Tnfrsf1a	6.3919e-07	0.237565	0.264	0.173	0.0121063	6
Tm2d2	6.41138e-07	0.246837	0.322	0.232	0.0121432	6
Got2	6.52686e-07	0.254067	0.277	0.189	0.0123619	6
Vasn	6.55856e-07	0.272495	0.36	0.263	0.0124219	6
Fkbp10	6.66224e-07	0.302028	0.338	0.26	0.0126183	6
Asna1	6.73747e-07	0.242352	0.271	0.179	0.0127608	6
Mxra8	7.51633e-07	0.307445	0.519	0.5	0.0142359	6
4921524J17Rik	7.77537e-07	0.157079	0.137	0.069	0.0147266	6
Arhgap10	9.41722e-07	0.164025	0.102	0.046	0.0178362	6
Lamtor5	1.02765e-06	0.219303	0.481	0.444	0.0194638	6
Foxp1	1.0336e-06	0.279813	0.404	0.309	0.0195765	6
Atg10	1.07056e-06	0.122613	0.121	0.057	0.0202764	6
Cirbp	1.11358e-06	0.288113	0.36	0.279	0.0210912	6
H2afv	1.1416e-06	0.252364	0.471	0.42	0.0216219	6
Limch1	1.34719e-06	0.338609	0.417	0.356	0.0255158	6
Eid1	1.40736e-06	0.268542	0.309	0.23	0.0266555	6
Tecr	1.50276e-06	0.178311	0.618	0.613	0.0284623	6
Mdh2	1.51888e-06	0.200091	0.551	0.521	0.0287676	6
Taldo1	1.58654e-06	0.243608	0.478	0.438	0.0300491	6
Clptm1	1.61993e-06	0.242499	0.239	0.156	0.0306814	6
Bace1	1.65031e-06	0.134298	0.131	0.064	0.031257	6
Fuca1	1.65818e-06	0.280021	0.306	0.225	0.0314059	6
Cd302	1.88818e-06	0.217667	0.197	0.117	0.0357621	6
Api5	1.98341e-06	0.129729	0.127	0.062	0.0375657	6
Crem	2.31003e-06	0.175878	0.111	0.053	0.043752	6
Timp2	1.71364e-17	0.229344	0.777	0.769	3.24563e-13	6
1190002N15Rik	1.43182e-46	0.210979	0.172	0.027	2.71186e-42	6
2210407C18Rik	8.51685e-103	1.28285	0.538	0.138	1.61309e-98	6
Bdnf	7.53688e-35	0.544196	0.334	0.118	1.42748e-30	6
Cd47	4.94697e-13	0.337793	0.296	0.163	9.36956e-09	6
Col6a1	1.91572e-18	0.420037	0.548	0.414	3.62837e-14	6
Col6a2	1.42671e-18	0.402803	0.637	0.489	2.7022e-14	6
Colec12	6.72414e-25	0.511849	0.328	0.144	1.27355e-20	6
Crispld2	3.38785e-76	0.91798	0.701	0.324	6.41659e-72	6
Ctsl	2.20428e-28	0.468764	0.682	0.535	4.1749e-24	6
Cxcl12	1.67535e-44	0.695665	0.392	0.136	3.17311e-40	6
Enpp2	1.20677e-60	0.636445	0.264	0.05	2.28562e-56	6
Epdr1	2.16846e-15	0.381607	0.325	0.179	4.10707e-11	6
Fam162a	4.75133e-21	0.393639	0.653	0.545	8.99902e-17	6
Fbln5	1.78567e-162	1.16616	0.978	0.723	3.38206e-158	6
H2-D1	1.80869e-17	0.41796	0.57	0.45	3.42567e-13	6
Hexa	6.77278e-30	0.56461	0.541	0.351	1.28276e-25	6
Htra1	2.24817e-120	0.679184	0.984	0.917	4.25803e-116	6
Kcne4	4.7663e-47	0.323587	0.191	0.033	9.02738e-43	6
Lamp2	3.91877e-11	0.309217	0.264	0.147	7.42214e-07	6
Ldhb	3.31227e-16	0.351992	0.608	0.519	6.27344e-12	6
Lmo4	5.61605e-20	0.513533	0.341	0.173	1.06368e-15	6
Ltbp1	2.53077e-41	0.562853	0.726	0.55	4.79327e-37	6
Meg3	3.88234e-62	0.982991	0.678	0.323	7.35316e-58	6
Myl12a	1.01999e-26	0.255002	0.882	0.894	1.93185e-22	6
Nbl1	1.32591e-120	1.10753	0.78	0.334	2.51127e-116	6
Ncam1	1.24814e-49	0.609222	0.796	0.557	2.36397e-45	6
Olfml2b	1.22982e-66	0.83112	0.551	0.213	2.32928e-62	6
Pcp4l1	1.26474e-33	0.588033	0.688	0.516	2.39542e-29	6
Ppic	3.07069e-62	0.770102	0.516	0.192	5.8159e-58	6
Scpep1	6.43263e-22	0.461857	0.366	0.188	1.21834e-17	6
Sdcbp	3.83579e-14	0.414922	0.401	0.267	7.26499e-10	6
Serpine2	6.94864e-41	0.381897	0.99	0.973	1.31607e-36	6
Shisa4	4.43366e-20	0.53712	0.468	0.301	8.39735e-16	6
Smoc1	1.17141e-96	0.965163	0.771	0.353	2.21864e-92	6
Sost	1.25954e-49	0.504106	0.952	0.933	2.38557e-45	6
Timp3	1.47671e-29	0.323329	0.882	0.826	2.79689e-25	6
Tmem59	1.2913e-21	0.33152	0.748	0.644	2.44572e-17	6
Vcan	5.2334e-52	0.714011	0.516	0.199	9.91206e-48	6
Zfand6	3.60931e-07	0.268712	0.258	0.164	0.00683603	6
