# Supplementary material for: Positional transcriptomics shed light on site-specific pathologies of the aorta
Source: Research Square preprint supplement (doi:10.21203/rs.3.rs-951818/v1), 2021-10-28
Supplement: Supplementary file 2 [file 4a03bfcdfb38e787d7f1915b.xlsx]

## Sheet: Sheet1
Supplemental Excel File 4: Top 10 Gene Ontology Categories per anatomic location signature.
Top 10 summary gene ontology categories for each of the three anatomic locations sorted by -Log10 of p-value as generated by metascape using express analysis with default parameters after filtering for duplicate terms. Abbreviated Label is the shortened term descriptor for each listed category used in panels 3D (carotid), 4D (aortic arch) and 5D (descending aorta), respectively.
Anatomic Location	Category	Term	Description	Abbreviated Label	LogP	Log(q-value)	gene membership (using gene symbol)
Carotid_Gene Ontology 1	WikiPathways	WP3888	VEGFA-VEGFR2 Signaling Pathway	VEGFA-VEGFR2 Signaling	-23.0146	-18.6557	ACTG1,ARF4,ARF6,ATF4,CAV1,CDC42,CFL1,CCN2,RCAN1,HBEGF,DUSP5,EGR1,EIF4G1,EPRS1,EWSR1,FOXO1,HMGB1,NR4A1,DNAJA1,HSPA1A,CCN1,JUN,DNAJB9,NFKBIA,NR4A2,PAK2,PPP2CA,MAP2K3,PTGS2,PTMA,PTPN11,RAC1,RAP1B,SDCBP,SET,SSR3,STAT3,TMSB4X,TNXB,TPM3,TXN,YWHAE,NR4A3,ADAMTS1,RBM39,DNAJB4,COPG1,PABPC1,IER5,TUBA1C,NEXN,DHX36
Carotid_Gene Ontology 2	GO Biological Processes	GO:0070848	response to growth factor	Response to Growth Factor	-19.3418	-15.2839	ARF6,BDNF,ZFP36L1,ZFP36L2,CAV1,COL1A1,COL1A2,COL3A1,CCN2,DDX5,DUSP3,EGR1,EMD,EXT1,FOS,GATA6,HIF1A,NR4A1,HNRNPF,HES1,HSPA1A,ID1,CCN1,ITGA5,JUN,LIMS1,LOX,SMAD7,MARS1,NEDD4,NTF3,NTRK3,PDE3A,POLR2C,MAP2K3,PTBP1,PTPN11,SDCBP,SKIL,TGFB2,TGFBR1,TPR,UBA52,UBC,UBE2D3,ZFP36,USP9X,LTBP4,KLF4,IER2,EIF4A3,TOB1,SPINT2,BAMBI,HEYL,ZBTB7A,ERRFI1,ASPN,CORO1B,RASL11B,HTRA3,VWC2,INHBA,CCN3,SUB1,RBPMS
Carotid_Gene Ontology 3	Reactome Gene Sets	R-HSA-9006934	Signaling by Receptor Tyrosine Kinases	Receptor Tyrosine Kinase Signaling	-16.3984	-12.6416	ACTG1,APOE,ARF6,BDNF,CALM1,CAV1,CDC42,CHD4,COL1A1,COL1A2,COL3A1,CYBA,HBEGF,DUSP3,EGR1,FOS,FOSB,HNRNPF,ID1,ID2,ID3,IGF1R,JUNB,JUND,NAB1,NEDD4,NTF3,NTRK3,PAK2,POLR2C,PPP2CA,PRKACA,PTBP1,PTPN11,RAC1,RAP1B,RRAD,SGK1,STAT3,UBA52,UBC,IRS2,NCOR1,TRIB1,SPINT2,WWP1,ARC
Carotid_Gene Ontology 4	Reactome Gene Sets	R-HSA-1280215	Cytokine Signaling in Immune system	Cytokine Signaling Immune system	-16.2858	-12.6259	BST2,CAMK2B,CAMK2D,CDC42,CDKN1A,CFL1,COL1A2,DUSP3,EGR1,EIF4A1,EIF4A2,EIF4G1,FOXO1,FOS,HIF1A,HLA-A,HMGB1,HNRNPF,IFNAR2,IL11RA,JUN,JUNB,MCL1,MSN,MT2A,NEDD4,NFKBIA,PAK2,PIM1,PPP2CA,PRKACA,MAP2K3,PSMC6,PTGS2,PTPN11,RAP1B,RORA,STAT3,TIMP1,TNFRSF1A,TPR,UBA52,UBC,YWHAZ,IRS2,TNFSF12,SOCS2,SQSTM1,SOCS3,EIF4A3,HNRNPDL,IFITM3,TNFRSF12A,PELI2,PELI1,NUP85,CFH
Carotid_Gene Ontology 5	Reactome Gene Sets	R-HSA-8953854	Metabolism of RNA	RNA Metabolism	-15.954	-12.3733	ADARB1,ZFP36L1,DDX1,DDX5,EIF4A1,EIF4A2,EIF4G1,EPRS1,FBL,ETF1,FUS,HNRNPF,HNRNPU,HSPA1A,MAGOH,SNU13,PCBP1,PCBP2,POLR2C,PPP2CA,PSMC6,PTBP1,RPL6,RPL9,SET,SRSF2,SRSF7,TRA2B,SNRPB2,SNRPE,SNRPF,SNRPG,TPR,UBA52,UBC,YWHAZ,ZFP36,LAGE3,EIF4A3,RBM8A,SRRM1,RPL35,TUT4,SF3B1,PABPC1,RPS27L,LSM8,CWC25,OSGEP,TSEN34,NUP85,RBM17,RPL10L,RPL22L1,CLK1,HNRNPH3,LGALS3,RBM3,RP9,SFPQ,SON,PPIG,RBM39,ACIN1,ZBTB7A,LUC7L2,SLC3…
Carotid_Gene Ontology 6	GO Biological Processes	GO:0045936	negative regulation of phosphate metabolic process	Regulation of Phosphate Metabolism	-15.4244	-11.9907	ADARB1,APOE,ATF3,CALM1,CAV1,CDKN1A,GADD45A,DUSP1,DUSP3,DUSP5,DUSP8,EIF4G1,FABP4,FOXO1,HNRNPU,DNAJA1,IGF1R,INHBA,LGALS3,SMAD7,NTF3,NTRK3,PAK2,PER1,PPP1R10,PPP2CA,PTPRB,RGS2,RGS4,SET,TGFB2,YWHAE,PLPP3,IRS2,SOCS3,SPAG9,KLF4,NCOR1,HIPK3,TRIB1,HEXIM1,TMED2,PPP1R15A,PPP1R14B,ERRFI1,CAMK2N1,PARVA,GGNBP2,ZBED3,MIDN,HSPA1A,SQSTM1,CRTAP,SVBP,EIF4A2,ZFP36,DDIT3,DDX3X,RCAN1,HIF1A,MCL1,NFE2L2,CCN3,PDE3A,PDE4B…
Carotid_Gene Ontology 7	GO Biological Processes	GO:0001944	vasculature development	Vascular Development	-14.872	-11.5545	ACTG1,ADM,APOE,RHOB,ZFP36L1,BTG1,CAV1,CDC42,COL1A1,COL1A2,CCN2,GADD45A,DDIT3,EGR1,FOXC2,FOXS1,GATA6,HIF1A,HK2,HMGB1,NR4A1,HES1,ID1,CCN1,ITGA5,JUN,JUNB,LOX,SMAD7,MYLK,NFE2L2,CCN3,SERPINE1,ENPP2,PTGS2,PTPRB,RORA,SAT1,SGCB,TGFB2,TGFBR1,XBP1,ZFAND5,TNFSF12,SOCS3,KLF4,HAND2,ADAMTS1,KLF2,TMED2,TNFRSF12A,ERRFI1,PARVA,FKBP10,GGNBP2,RSPO3,HSPB6,ARF6,HBEGF,IGF1R,LGALS3,NEDD9,NTF3,NTRK3,DDR2,MAP2K3,RAC1,S10…
Carotid_Gene Ontology 8	Canonical Pathways	M167	PID AP1 PATHWAY	AP-1 Pathway	-14.2083	-10.9633	ATF3,COL1A2,DUSP1,EGR1,FABP4,FOS,FOSB,FOSL2,HIF1A,HLA-A,CCN1,JUN,JUNB,JUND,MAFG,MT2A,TIMP1,TRIP6,RHOB,ATF4,CALM1,CAMK2D,CAV1,COL1A1,CRIP1,FOXO1,GSN,CYTB,ND5,NEDD4,NFE2L2,PAM,PPP2CA,TXN,UBE2D3,NR4A3,KLF4,EIF4A3,KLF2,SEC31A,KDM6B,OSER1,SLC38A2,DHX36
Carotid_Gene Ontology 9	GO Biological Processes	GO:0071407	cellular response to organic cyclic compound	Response to Organic Cyclic Compound	-14.069	-10.8562	ADCY5,ATF4,ATP1A1,ZFP36L1,ZFP36L2,KLF9,CAV1,CEBPB,COL1A1,DDX5,EGR1,FOXO1,GNAI1,GNB1,HNRNPU,DNAJA1,ID1,ID3,INHBA,MSN,ND3,NEDD4,PAK2,PDE3A,PDE4B,PER1,PIM1,PRKACA,RAP1B,RORA,SGK1,YWHAH,ZFP36,NR4A3,KLF4,NCOR1,KLF2,KANK2,HEYL,ZBTB7A,ERRFI1,TMEM38B,COLEC12,ADM,CALM1,CDKN1A,CCN2,DUSP1,FOS,FOSB,HMGB1,LOX,PAM,TGFB2,NFKBIA,SERPINE1,XBP1,TRIB1
Carotid_Gene Ontology 10	GO Biological Processes	GO:0009611	response to wounding	Response to Wounding	-13.9866	-10.8038	ACTG1,ADM,APOE,ARF4,ZFP36L1,ZFP36L2,CAV1,ENTPD1,CDC42,CDKN1A,COL1A1,COL1A2,COL3A1,CCN2,HBEGF,EXT1,FOXC2,GATA6,GNB1,GSN,H3-3A,HIF1A,HMGB1,ID3,CCN1,INHBA,ITGA5,LOX,MAFG,MYLK,NFE2L2,CCN3,SERPINE1,PRKACA,PTPN11,RAC1,SDC4,TGFB2,TGFBR1,TIMP1,TPM1,XBP1,YWHAZ,ZFP36,MAFK,KLF4,MAFF,TNFRSF12A,CORO1B,FKBP10,NDEL1,ANO6,ADCY5,HK2,PAM,SOCS2
AorticArch_Gene Ontology 1	KEGG Pathway	ko04142	Lysosome	Lysosome	-10.7086	-6.67682	ATP6AP1,CD63,CTSB,CTSD,CTSV,HEXA,HEXB,LAMP1,CTSA,LGMN,PSAP,CTSF,LAPTM4A,SERPING1,SERPINI1,PLAT,MMP23B,P3H3,PAMR1,KAZALD1,HSP90B1,ANXA1,ANXA5,FRZB,SFRP2,FSTL1,WIF1,PLXDC2,TUBA1A,APP
AorticArch_Gene Ontology 2	GO Biological Processes	GO:0045055	regulated exocytosis	Regulated Exocytosis	-10.5229	-6.67682	ANXA5,APP,B2M,SERPING1,CD63,CLU,CNN2,CTSB,CTSD,CYB5R3,ECM1,GRN,HEXB,HSP90AA1,LAMP1,PGAM1,PKM,CTSA,PSAP,PSMA2,PSMD7,RAP1A,RARRES2,SRP14,TAGLN2,NAPA,PRDX4,SDF4,HLA-A,ACE,CD200,ANXA1,CD81
AorticArch_Gene Ontology 3	Reactome Gene Sets	R-HSA-1474244	Extracellular matrix organization	Extracellular Matrix Organization	-10.3909	-6.67682	ACAN,APP,BGN,BSG,CAPNS1,CD151,COL15A1,CTSB,CTSD,CTSV,LTBP1,LTBP2,MFAP4,MFAP5,LAMC3,FBLN5,P3H3,EMILIN1,CAV2,ECM2,SFRP2,MIA,MMP23B,PRDX4,KAZALD1,CCDC80,ECM1,IGFBP2,SPARCL1,ABI3BP
AorticArch_Gene Ontology 4	GO Biological Processes	GO:0048002	antigen processing and presentation of peptide antigen	Antigen Processing and Presentation	-10.303	-6.67682	B2M,CALR,CTSD,CTSV,ACE,PDIA3,HLA-A,LGMN,PSMA2,PSMB2,PSMC5,PSMD7,PSMD8,PSME1,CTSF,RPN2,UBE2B,UCHL1,CD81,CLU,CTSB,GPX1,HSPA5,HSP90AA1,HSP90B1,GABARAPL2,NUPR1,ATRAID,JKAMP,RCN3,PDCL3,HM13,KCTD10,FBXL22,CD200,CTSA,RAP1A,TUBA1A,FRZB,IGFBP2,SFRP2,WIF1,DKK3,SOST,OAZ2,APP,CPE,PIN1,VPS29,WDR61,HSPB1,ATP6AP1,ENO1,LDHA,PKM,SOD3,TMBIM6,COX4I2,SEPTIN7,PRKAR1A,SERPING1,GRN,LAMP1,CDC37,ANXA1,UACA,TSPO,PGAM1,KRT…
AorticArch_Gene Ontology 5	GO Biological Processes	GO:0006457	protein folding	Protein Folding	-9.135	-5.95356	B2M,CALR,CLU,GNB2,GRN,PDIA3,HSPA5,HSPB1,HSP90AA1,PPIC,HSP90B1,PDIA6,PRDX4,CDC37,PDCL3,ATP1B3,LAMP1,PIN1,UBE2B,GLMP,CD81,CTSA
AorticArch_Gene Ontology 6	GO Biological Processes	GO:0006914	autophagy	Autophagy	-7.81462	-4.90287	TSPO,CAPNS1,CLU,DAP,HSPB1,HSP90AA1,CTSA,PSAP,RHEB,TMBIM6,UCHL1,VDAC1,TMEM59,FEZ2,FEZ1,CDC37,GABARAPL2,NUPR1,VPS29,MAP1LC3B,APP,B2M,ACE,GPX1,HSPA5,LRPAP1,PRKAR1A,UBE2B,LMO4,EMILIN1,EML2,CERS2,SOST,ITM2C,ENO1,GRN,HEXB,PIN1,ATRAID,PDCL3
AorticArch_Gene Ontology 7	GO Biological Processes	GO:0032963	collagen metabolic process	Collagen Metabolic Process	-7.76423	-4.88245	COL15A1,CTSB,CTSD,F2R,MFAP4,RAP1A,MMP23B,P3H3,EMILIN1,RCN3,ACAN,BSG,CAPNS1,CTSV,CD151
AorticArch_Gene Ontology 8	GO Biological Processes	GO:0006090	pyruvate metabolic process	Pyruvate Metabolic Process	-7.37446	-4.57186	APP,BSG,ENO1,GALK1,LDHA,LDHB,PFKP,PGAM1,PKM,VDAC1,NUPR1,MDH2,GPX1,HSPB1,PSMA2,PSMB2,PSMC5,PSMD7,PSMD8,PSME1,SSB,SMPDL3A,TRIR,WDR61,NT5C3B,TSPO,CYB5A,CYB5R3,GSTM3,GSTM5,PRDX1,TCN2,TECR,PRDX4,DCXR,COMT,ALDH2,ANXA1,BGN,RBP1,MSMO1,ECI2,HEXB,NDUFA8,UQCRC2,COX4I2,SUCLG1,ACAN,HEXA,RPN2,ITM2B,TMEM59,ITM2C,GXYLT2,RHEB,OAT,IGFBP2,HSP90AA1,SERPINI1
AorticArch_Gene Ontology 9	WikiPathways	WP3888	VEGFA-VEGFR2 Signaling Pathway	VEGFA-VEGFR2 Signaling	-7.08239	-4.32738	ANXA1,RHOC,BSG,CALR,CRIP2,CSRP1,CSRP2,CTNNA1,GPX1,HSPB1,HSP90AA1,LDHA,RAP1A,RCN1,NAPA,PDIA6,SH3BGRL3
AorticArch_Gene Ontology 10	Reactome Gene Sets	R-HSA-114608	Platelet degranulation	Platelet Degranulation	-7.06304	-4.32738	ANXA5,APP,SERPING1,CD63,CLU,ECM1,HSPA5,PSAP,RARRES2,TAGLN2,ATP1B3,BSG,F2R,GNB2,PLAT,PRKAR1A,RAP1A,THBD,TSPAN7,TUBA1A
DescendingAorta_Gene Ontology 1	GO Biological Processes	GO:0006119	oxidative phosphorylation	Oxidative Phosphorylation	-32.3499	-28.0514	ABCD1,ATP5F1A,ATP5F1B,ATP5F1E,ATP5MC1,ATP5ME,COX4I1,COX6A1,COX6C,COX7A2,COX7C,COX8A,ATP6,COX3,ND1,NDUFA2,NDUFA3,NDUFA4,NDUFA6,NDUFB7,ATP5MF,ATP5MG,UQCR11,UQCRQ,UQCR10,NDUFA13,NDUFA11,UQCRHL,CLTC,ITPR1,TGM2,ATP2A2,ATP1A2,TMSB4X,NPR1,HACD1,ELOVL1,MTHFD2L,PTGIS,ACTN4,CLSTN1,TPM1,AQP1,ATP2B4,DMPK,FHL1,FLNA,SERPINE2,WWP2,CASQ1,PKD1,JPH2,HIGD1A,UBA52,NDRG1
DescendingAorta_Gene Ontology 2	Reactome Gene Sets	R-HSA-156902	Peptide chain elongation	Peptide Chain Elongation	-31.8083	-28.0514	RPL12,RPL30,RPL28,RPL31,RPL34,RPL36AL,RPL37,RPL37A,RPL38,RPL39,RPL36A,RPLP1,RPLP2,RPS12,RPS15,RPS17,RPS21,RPS26,RPS28,RPS29,UBA52,RPL35,RPL36,RPS27L,SEC61G,DAG1,PRKAR2A,CXCL12,ENAH,CLTC,COL4A2,COL6A2,COL6A3,ITGA9,MYH11,NRTN,PDLIM7,MYL9,EXOSC4,NOP10,MYO1C,RACK1,CLSTN1,NDUFA13,EMC7,ROMO1,SAMD4A,ATP2B4,FLNA,RAMP1,TOMM7,ATOX1,GSTP1,HIGD1A,ANAPC7,H2AJ,ABCD1
DescendingAorta_Gene Ontology 3	Reactome Gene Sets	R-HSA-3000178	ECM proteoglycans	ECM Proteoglycans	-13.065	-10.6973	COL4A2,COL6A2,COL6A3,COMP,VCAN,DAG1,FN1,HSPG2,ITGA9,LAMB2,SPARC,ITGA8,ACTN4,CTNNB1,FLNA,PPP1R12B,VCL,MYL9,CLSTN1,HTRA1,P3H2,COL18A1,MFGE8,OGN,CCN5,POSTN,MYH11,TGM2,CLTC,FGFR2,ITPR1,MEF2C,CXCL12,UBA52,NRTN,ATP1A2
DescendingAorta_Gene Ontology 4	GO Biological Processes	GO:0061061	muscle structure development	Muscle Structure Development	-12.232	-9.88166	ZFHX3,ATP2A2,BNIP2,CASQ1,COL6A3,COMP,CTNNB1,DAG1,DMPK,FGFR2,FHL1,MBNL1,MEF2C,MYH11,SMTN,TAGLN,TPM1,TCAP,TBX18,PDLIM1,PDLIM7,PDLIM3,ASB2,MYOZ2,JPH2,ACTN4,DES,MYL9,ATP1A2,FLNA,MYO1C,CNN1
DescendingAorta_Gene Ontology 5	Reactome Gene Sets	R-HSA-397014	Muscle contraction	Muscle Contraction	-10.3054	-8.02926	ATP1A2,ATP2A2,ATP2B4,CALD1,CASQ1,DES,DMPK,ITPR1,MYH11,NPR1,TPM1,VCL,TCAP,MYL9,CNN1,COMP,FLNA,PPP1R12B,SMTN,MYOZ2,TBX18,DAG1,CXCL12,POSTN,AQP1,PRKAR2A,RCAN2,RAMP1,JPH2,MEF2C,FTH1,PKD1,TMSB4X,GPSM2,ATOX1,ATP5F1B,TGM2,CTNNB1,ABCD1,CLTC,SLC22A1,UBA52,EMB,CLSTN1
DescendingAorta_Gene Ontology 6	CORUM	CORUM:178	Respiratory chain complex I (holoenzyme), mitochondrial	Respiratory Chain Complex I	-9.39917	-7.15421	ND1,NDUFA2,NDUFA3,NDUFA4,NDUFA6,NDUFB7,NDUFA13,NDUFA11,ITPR1
DescendingAorta_Gene Ontology 7	GO Biological Processes	GO:0001568	blood vessel development		-7.61205	-5.42341	AQP1,ATP2B4,ATP5F1B,COL4A2,COMP,CTNNB1,DAG1,FGFR2,FLNA,FN1,HOXA7,HSPG2,MCAM,MEF2C,MFGE8,NPR1,PKD1,PTGIS,SPARC,RAMP1,COL18A1
DescendingAorta_Gene Ontology 8	GO Biological Processes	GO:0030029	actin filament-based process	Actin Filament Based Process	-7.27788	-5.10226	ACTN4,AQP1,ATP1A2,CASQ1,CNN1,DES,FLNA,MYH11,MYO1C,CXCL12,SMTN,TMSB4X,TPM1,TCAP,PDLIM1,PDLIM7,DSTN,PDLIM3,MYOZ2,ENAH,SYNPO2,COMP,CLTC,CTNNB1,PKD1,GPSM2,ATP2A2,FN1,NPR1
DescendingAorta_Gene Ontology 9	KEGG Pathway	hsa04810	Regulation of actin cytoskeleton	Regulation - Actin Cytoskeleton	-7.27647	-5.10226	ACTN4,FGFR2,FN1,ITGA9,PPP1R12B,CXCL12,TMSB4X,VCL,ITGA8,MYL9,CLSTN1,ENAH,APLP2,FLNA,SPARC,ATP5F1A,ATP5F1B,MCAM,MYO1C,RACK1,POSTN,DAPK2,ITPR1,ATP2A2,ATP2B4,SERPINE2,PRKAR2A
DescendingAorta_Gene Ontology 10	WikiPathways	WP2118	Arrhythmogenic Right Ventricular Cardiomyopathy	Cardiomyopathy - ARVC/D	-6.22157	-4.09566	ACTN4,ATP2A2,CTNNB1,DAG1,DES,ITGA9,ITGA8,TPM1,FGFR2,LAMB2,CXCL12,PRKAR2A,PPP1R14A,CLTC,RACK1,TNS1,VCL
